# Supplementary material for: Low-molecular-weight anti-HIV-1 agents targeting HIV-1 capsid proteins
Source: Royal Society of Chemistry journal article supplement (doi:10.1039/d2ra06837k), 2023-01-01
Supplement: d2ra06837k1.pdf [file d2ra06837k1.pdf]

## Electronic supplementary information (ESI)

### Low-molecular-weight Anti-HIV-1 Agents Targeting HIV-1 Capsid Proteins

Takuya Kobayakawa,<sup>a</sup> Masaru Yokoyama,<sup>b</sup> Kohei Tsuji,<sup>a</sup> Masayuki Fujino,<sup>c</sup> Masaki Kurakami,<sup>a</sup> Takato Onishi,<sup>a</sup> Sayaka Boku,<sup>a</sup> Takahiro Ishii,<sup>a</sup> Yutaro Miura,<sup>a</sup> Kouki Shinohara,<sup>a</sup> Yuki Kishihara,<sup>a</sup> Nami Ohashi,<sup>d</sup> Osamu Kotani,<sup>b</sup> Tsutomu Murakami,<sup>\*c</sup> Hironori Sato<sup>\*b</sup> and Hirokazu Tamamura<sup>\*a</sup>

<sup>a</sup>*Institute of Biomaterials and Bioengineering, Tokyo Medical and Dental University (TMDU), 2-3-10 Kandasurugadai, Chiyoda-ku, Tokyo 101-0062, Japan. E-mail: tamamura.mr@tmd.ac.jp*

<sup>b</sup>*Pathogen Genomics Center, National Institute of Infectious Diseases, Musashimurayama, Tokyo 208-0011, Japan. E-mail: hirosato@nih.go.jp*

<sup>c</sup>*AIDS Research Center, National Institute of Infectious Diseases, Shinjuku-ku, Tokyo 162-8640, Japan. E-mail: tmura@nih.go.jp*

<sup>d</sup>*Showa Pharmaceutical University, Machida, Tokyo 194-8543, Japan*

#### Table of contents

|                                                                                              |     |
|----------------------------------------------------------------------------------------------|-----|
| <b>I. General information</b> .....                                                          | S2  |
| <b>I-I. General methods</b> .....                                                            | S2  |
| <b>I-II. Characterization Data</b> .....                                                     | S2  |
| <b>II. Experimental procedures</b> .....                                                     | S3  |
| <b>III. References</b> .....                                                                 | S20 |
| <b>IV. <sup>1</sup>H NMR and <sup>13</sup>C NMR charts (compounds 25A, 25B and 38)</b> ..... | S21 |
| <b>V. High Resolution Mass Spectrometry (HRMS) charts (compounds 25A, 25B and 38)</b> .....  | S24 |
| <b>VI. HPLC charts (compounds 2, 17, 18, 19, 25A, 25B, 26, 27, 29, 36, 37 and 38)</b> .....  | S27 |

## I. General information

### I-I. General methods

All reactions were performed using commercially supplied reagents and solvents in dried glassware under an atmosphere of nitrogen unless otherwise noted. Thin-layer chromatography (TLC) was performed on Merck 60F<sub>254</sub> precoated silica gel plates and was visualized by fluorescence quenching under UV light and by staining with phosphomolybdic acid, *p*-anisaldehyde, or ninhydrin, respectively. Flash column chromatography was carried out with silica gel 60 N (Kanto Chemical Co., Inc.) or automatic silica gel flash column chromatography system (Isolera One (Biotage, Sweden). Preparative RP-HPLC was performed using a Cosmosil 5C<sub>18</sub>-ARII column (20 × 250 mm, Nacalai Tesque, Inc., Japan) on a JASCO PU-2089 plus (JASCO Corporation, Ltd., Japan) in a linear gradient of CH<sub>3</sub>CN containing 0.1% TFA (Solvent B) in H<sub>2</sub>O containing 0.1% (v/v) TFA (Solvent A) at a flow rate of 10 cm<sup>3</sup> min<sup>-1</sup>, and eluting products were detected by UV at 254 nm.

### I-II. Characterization Data

<sup>1</sup>H NMR (400 MHz or 500 MHz) and <sup>13</sup>C NMR (100 MHz or 125 MHz) spectra were recorded using a Bruker AVANCE III 400 spectrometer and Bruker AVANCE 500 spectrometer (Bruker, USA). Coupling constants are reported in Hertz, and peak shifts are reported in δ (ppm) relative to CDCl<sub>3</sub> (<sup>1</sup>H 7.26 ppm, <sup>13</sup>C 77.16 ppm), MeOD (<sup>1</sup>H 3.31 ppm, <sup>13</sup>C 49.00 ppm) or dimethyl sulfoxide (DMSO)-*d*<sub>6</sub> (<sup>1</sup>H 2.50 ppm, <sup>13</sup>C 39.52 ppm). Low- and high-resolution mass spectra were recorded on a Bruker Daltonics micrOTOF focus in the positive and negative detection mode. For analytical RP-HPLC, a Cosmosil 5C<sub>18</sub>-ARII column (4.6 × 250 mm, Nacalai Tesque, Inc.) was employed with a linear gradient of CH<sub>3</sub>CN containing 0.1% (v/v) trifluoroacetic acid (TFA) (Solvent B) in H<sub>2</sub>O containing 0.1% (v/v) TFA (Solvent A) at a flow rate of 1.0 cm<sup>3</sup> min<sup>-1</sup> on a PU-2089 plus (JASCO Corporation, Ltd.), and eluting products were detected by UV at 254 nm. Elemental analyses were performed by A Rabbit Science Japan Co., Ltd., Sagamihara, Kanagawa.



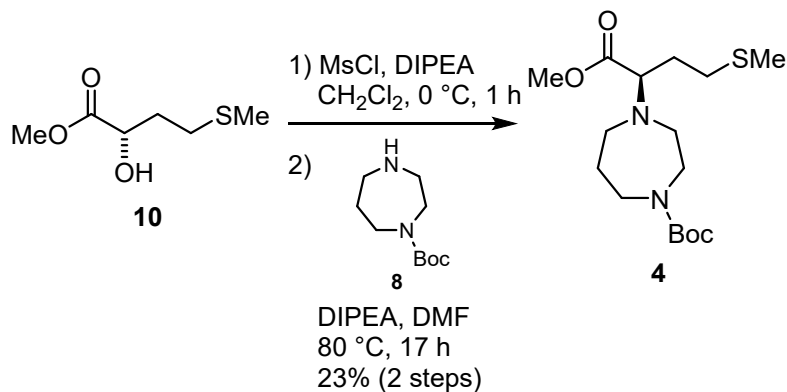

***tert*-Butyl (*R*)-4-(1-methoxy-4-(methylthio)-1-oxobutan-2-yl)-1,4-diazepane-1-carboxylate (4):** To a solution of **10** (4.96 g, 30.2 mmol) and *N,N*-diisopropylethylamine (DIPEA, 15.8 mL, 90.6 mmol) in CH<sub>2</sub>Cl<sub>2</sub> (150 mL) was added mesyl chloride (MsCl, 4.00 mL, 45.3 mmol) at 0 °C. The reaction mixture was warmed to room temperature and stirred for 1 h. The reaction mixture was added saturated aqueous NH<sub>4</sub>Cl. The mixture was extracted with CH<sub>2</sub>Cl<sub>2</sub> and washed with brine. The organic layer was dried over MgSO<sub>4</sub> and concentrated under reduced pressure to provide the crude mesylate. The crude mesylate and DIPEA (15.8 mL, 90.6 mmol) in *N,N*-dimethylformamide (DMF, 60.0 mL) were added *tert*-butyl 1,4-diazepane-1-carboxylate **8** (12.1 g, 60.4 mmol) at room temperature. The reaction mixture was stirred at 80 °C for 17 h. The reaction was quenched by the addition of saturated aqueous NH<sub>4</sub>Cl and the mixture was extracted with EtOAc. The organic layer was dried over MgSO<sub>4</sub> and concentrated under reduced pressure followed by purification using flash column chromatography with *n*-hexane/EtOAc (3:1) to obtain the title compound **4** (2.41 g, 23% in 2 steps) as yellow oil: <sup>1</sup>H NMR (500 MHz, CDCl<sub>3</sub>): (mixture of rotamers) δ 1.45 (s, 9H), 1.69-1.82, (m, 1H), 1.84-2.01 (m, 2H), 2.09 (s, 3H), 2.56-2.72 (m, 4H), 2.80-2.91 (m, 2H), 3.33-3.50 (m, 5H), 3.69 (m, 3H); <sup>13</sup>C {<sup>1</sup>H} NMR (125 MHz, CDCl<sub>3</sub>): (mixture of rotamers) δ 15.4, 28.5 (3C), 29.1, 29.3, 30.9, 46.1, 48.4, 51.2, 51.8, 52.9, 66.5, 66.6, 79.2, 155.5, 173.3; HRMS (ESI), *m/z* calcd for C<sub>16</sub>H<sub>30</sub>N<sub>2</sub>O<sub>4</sub>S [M+H]<sup>+</sup> 347.1999, found 347.2001.

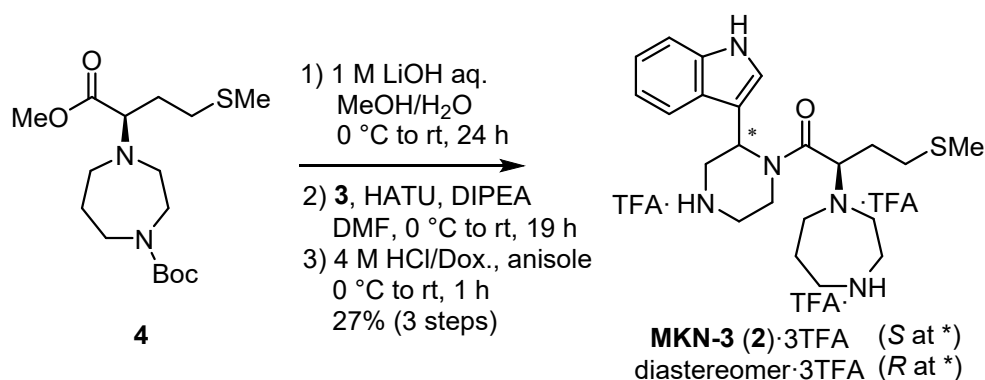

**(2*R*)-1-(2-(1*H*-Indol-3-yl)piperazin-1-yl)-2-(1,4-diazepan-1-yl)-4-(methylthio)butan-1-one·3TFA**

**(2·3TFA, MKN-3·3TFA):** To a solution of **4** (34.6 mg, 100 μmol) in MeOH (1.00 mL) was added 1.00 M LiOH aq. (250 μL, 250 μmol) at 0 °C. The reaction mixture was warmed to room temperature and stirred for 24 h. The reaction mixture was added saturated aqueous NH<sub>4</sub>Cl and extracted with CHCl<sub>3</sub>. The organic layer was dried

over MgSO<sub>4</sub> and concentrated under reduced pressure to provide the crude carboxylic acid. The carboxylic acid in DMF (1.00 mL) was added 1-[bis(dimethylamino)methylene]-1*H*-1,2,3-triazolo[4,5-*b*]pyridinium 3-oxide hexafluorophosphate (HATU, 41.8 mg, 110 μmol), DIPEA (105 μL, 600 μmol) and **3** (44.2 mg, 110 μmol) at 0 °C. The reaction mixture was warmed to room temperature and stirred for 19 h. The reaction was quenched by the addition of saturated aqueous NH<sub>4</sub>Cl and the mixture was extracted with EtOAc. The organic layer was dried over MgSO<sub>4</sub> and concentrated under reduced pressure to obtain the crude amide. The crude amide and anisole (130 μL, 1.20 mmol) in CH<sub>2</sub>Cl<sub>2</sub> (500 μL) was added 4 M HCl/dioxane (HCl/Dox., 500 μL, 2.00 mmol) at 0 °C. The reaction mixture was stirred for 1 h at room temperature. The mixture was concentrated under reduced pressure followed by purification with preparative RP-HPLC to obtain the *tris*-trifluoroacetate salt of the title compound **2** (20.6 mg, 27.2 μmol, 27% in 3 steps) as freeze-dried powder: *t*<sub>R</sub> = 21.6 min and 22.1 min (linear gradient of B in A, 10 to 30% over 40 min); <sup>1</sup>H NMR (500 MHz, DMSO-*d*<sub>6</sub>): (mixture of diastereomers) δ 1.76-2.09 (m, 6H), 2.73-3.39 (m, 10H), 3.90-4.24 (m, 7H), 5.75-6.18 (m, 1H), 6.91-7.06 (m, 1H, indole C5,C6-H), 7.08-7.12 (m, 1H, indole C5,C6-H), 7.32-7.52 (m, 2H, indole C2-H and C4,C7-H), 7.53-7.64 (m, 1H, indole C4,C7-H), 8.61-8.79 (m, 1H), 9.49-9.62 (m, 1H), 11.3 (br, 1H, indole N-H); <sup>13</sup>C {<sup>1</sup>H} NMR (125 MHz, DMSO-*d*<sub>6</sub>): (mixture of diastereomers) δ 15.1, 24.9, 25.0, 25.4, 25.9, 30.8, 30.9, 31.0, 38.6, 44.4, 45.3, 47.2, 50.8, 63.2, 109.6, 112.2, 115.9, 118.3, 119.1, 122.0, 125.1, 137.1, 158.7; HRMS (ESI), *m/z* calcd for C<sub>22</sub>H<sub>33</sub>N<sub>5</sub>OS [M+H]<sup>+</sup> 416.2479, found 416.2479. Anal. Calcd for C<sub>22</sub>H<sub>32</sub>N<sub>5</sub>OS·3TFA: C, 44.39; H, 4.79; N, 9.24. Found: C, 45.23; H, 5.67; N, 9.47.

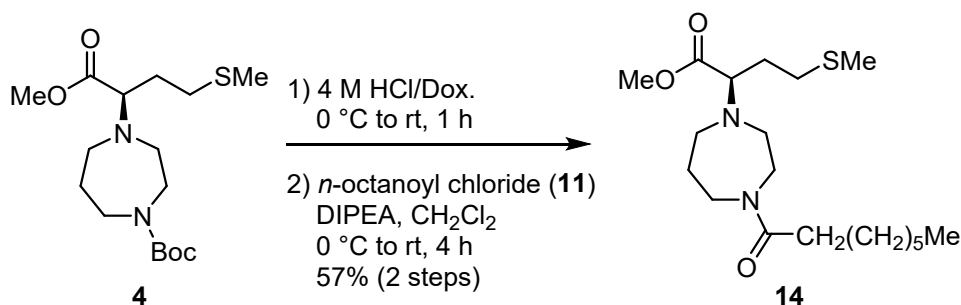

**Methyl (*R*)-4-(methylthio)-2-(4-octanoyl-1,4-diazepan-1-yl)butanoate (**14**):** Compound **4** (173 mg, 500 μmol) was added 4 M HCl/dioxane (2.50 mL, 10.0 mmol) at 0 °C. The reaction mixture was stirred at room temperature for 1 h. The mixture was concentrated under reduced pressure to obtain the crude amine. The crude amine in CH<sub>2</sub>Cl<sub>2</sub> (2.50 mL) was added DIPEA (348 μL, 2.00 mmol) and *n*-octanoyl chloride **11** (173 μg, 1.00 mmol) at room temperature. The reaction mixture was warmed to room temperature and stirred for 4 h. The reaction mixture was added silica gel and evaporated. The residue was purified by automated silica gel flush column chromatography system (Isolera One) with *n*-hexane/EtOAc (92:8 to 30:70) to obtain the title compound **14** (102 mg, 57% in 2 steps) as colorless oil: <sup>1</sup>H NMR (500 MHz, CDCl<sub>3</sub>): (mixture of rotamers) δ 0.86-0.89 (m, 3H), 1.28-1.31 (m, 8H), 1.62-1.63 (m, 2H), 1.69-2.03 (m, 4H), 2.09 (s, 3H), 2.27-2.31 (m, 2H), 2.56-2.98 (m, 6H), 3.44-3.62 (m, 5H), 3.68-3.70 (m, 3H); <sup>13</sup>C {<sup>1</sup>H} NMR (125 MHz, CDCl<sub>3</sub>): (mixture of rotamers) δ 14.2, 15.6, 22.8, 25.5, 29.3, 29.7, 31.1, 31.9, 33.6, 44.6, 47.2, 49.7, 51.5, 52.0, 52.7, 54.0, 66.7, 173.0, 173.3; HRMS

(ESI),  $m/z$  calcd for  $C_{19}H_{37}N_2O_3S$   $[M+H]^+$  373.2519, found 373.2514.

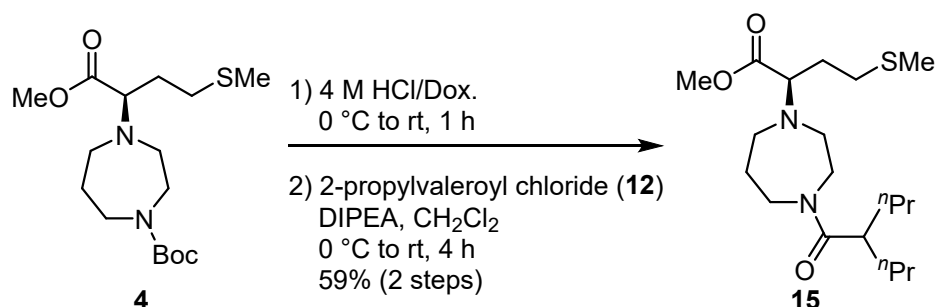

**Methyl (R)-4-(methylthio)-2-(4-(2-propylpentanoyl)-1,4-diazepan-1-yl)butanoate (15):** Compound **4** (173 mg, 500  $\mu$ mol) was added 4 M HCl/dioxane (2.50 mL, 10.0 mmol) at 0 °C. The reaction mixture was stirred at room temperature for 1 h, and then concentrated under reduced pressure to obtain the crude amine. The crude amine in CH<sub>2</sub>Cl<sub>2</sub> (2.50 mL) was added DIPEA (348  $\mu$ L, 2.00 mmol) and 2-propylvaleroyl chloride **12** (171  $\mu$ L, 1.00 mmol) at room temperature. The reaction mixture was warmed to room temperature and stirred for 4 h. The reaction mixture was added silica gel and evaporated. The residue was purified by automated silica gel flush column chromatography system (Isolera One) with *n*-hexane/EtOAc (92:8 to 30:70) to obtain the title compound **15** (106 mg, 59% in 2 steps) as colorless oil: <sup>1</sup>H NMR (500 MHz, CDCl<sub>3</sub>): (mixture of rotamers)  $\delta$  0.89 (t,  $J$  = 7.5 Hz, 6H), 1.21-1.41 (m, 6H), 1.62-2.04 (m, 6H), 2.09 (s, 3H), 2.56-2.98 (m, 7H), 3.49-3.64 (m, 4H), 3.68-3.69 (m, 3H); <sup>13</sup>C{<sup>1</sup>H} NMR (125 MHz, CDCl<sub>3</sub>): (mixture of rotamers)  $\delta$  14.5, 15.5, 21.1, 28.7, 29.4, 30.2, 31.1, 35.5, 35.6, 41.2, 44.6, 47.0, 49.5, 51.4, 53.3, 54.4, 66.7, 173.2, 176.1; HRMS (ESI),  $m/z$  calcd for  $C_{19}H_{36}N_2O_3S$   $[M+H]^+$  373.2519, found 373.2514.

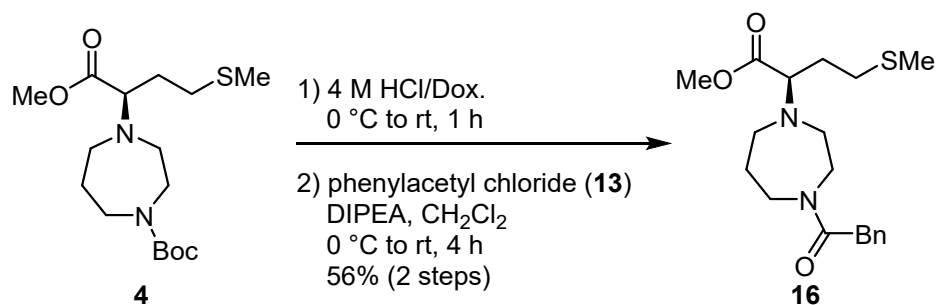

**Methyl (R)-4-(methylthio)-2-(4-(2-phenylacetyl)-1,4-diazepan-1-yl)butanoate (16):** Compound **4** (173 mg, 500  $\mu$ mol) was added 4 M HCl/dioxane (2.50 mL, 10.0 mmol) at 0 °C. The reaction mixture was stirred at room temperature for 1 h, and then concentrated under reduced pressure to obtain the crude amine. The crude amine in CH<sub>2</sub>Cl<sub>2</sub> (2.50 mL) was added DIPEA (348  $\mu$ L, 2.00 mmol) and phenylacetyl chloride **13** (132  $\mu$ L, 1.00 mmol) at room temperature. The reaction mixture was stirred at room temperature for 4 h. The reaction mixture was added silica gel and evaporated. The residue was purified by automated silica gel flush column chromatography system (Isolera One) with *n*-hexane/EtOAc (88:12 to 0:100) to obtain the title compound **16** (103 mg, 56% in

2 steps) as brown oil:  $^1\text{H}$  NMR (500 MHz,  $\text{CDCl}_3$ ): (mixture of rotamers)  $\delta$  1.66-1.76 (m, 1H), 1.77-1.91 (m, 2H), 1.92-2.01 (m, 1H), 2.08-2.09 (m, 3H), 2.50-2.91 (m, 6H), 3.44-3.72 (m, 10H), 7.22-7.33 (m, 5H);  $^{13}\text{C}$   $\{^1\text{H}\}$  NMR (125 MHz,  $\text{CDCl}_3$ ): (mixture of rotamers)  $\delta$  15.6, 28.3, 29.3, 31.0, 41.4, 44.8, 47.4, 50.1, 51.9, 51.5, 52.0, 53.8, 66.7, 126.9, 128.8, 128.9, 135.3, 170.8, 173.2; HRMS (ESI),  $m/z$  calcd for  $\text{C}_{19}\text{H}_{29}\text{N}_2\text{O}_3\text{S}$   $[\text{M}+\text{H}]^+$  365.1893, found 365.1888.

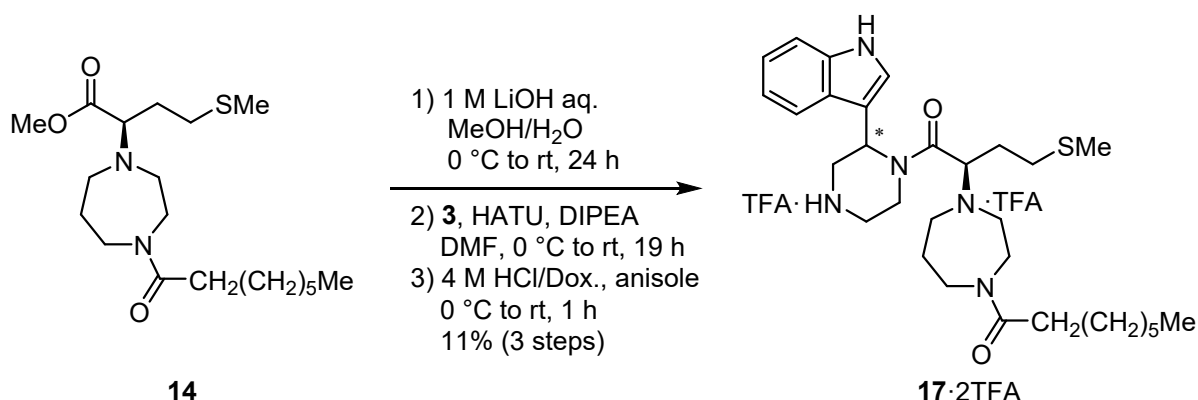

**1-(4-((2*R*)-1-(2-(1*H*-Indol-3-yl)piperazin-1-yl)-4-(methylthio)-1-oxobutan-2-yl)-1,4-diazepan-1-yl)-2-propylpentan-1-one·2TFA (17·2TFA):** To a solution of compound **14** (35.9 mg, 100  $\mu\text{mol}$ ) in MeOH (1.00 mL) was added 1.00 M LiOH aq. (250  $\mu\text{L}$ , 250  $\mu\text{mol}$ ) at  $0\text{ }^\circ\text{C}$ . The reaction mixture was stirred at room temperature for 24 h. The reaction was quenched by the addition of saturated aqueous  $\text{NH}_4\text{Cl}$  and extracted with  $\text{CHCl}_3$ . The organic layer was dried over  $\text{MgSO}_4$  and concentrated under reduced pressure to obtain the crude carboxylic acid. The crude carboxylic acid in DMF (1.00 mL) was added HATU (41.8 mg, 110  $\mu\text{mol}$ ), DIPEA (105  $\mu\text{L}$ , 600  $\mu\text{mol}$ ) and compound **3** (44.2 mg, 110  $\mu\text{mol}$ ) at  $0\text{ }^\circ\text{C}$ . The reaction mixture was stirred at room temperature for 19 h. The mixture was added saturated aqueous  $\text{NH}_4\text{Cl}$  and extracted with EtOAc. The organic layer was dried over  $\text{MgSO}_4$  and concentrated under reduced pressure to obtain the crude amide. The crude amide and anisole (109  $\mu\text{L}$ , 1.00 mmol) in  $\text{CH}_2\text{Cl}_2$  (500  $\mu\text{L}$ ) were added 4 M HCl/dioxane (500  $\mu\text{L}$ , 2.00 mmol) at  $0\text{ }^\circ\text{C}$ . The reaction mixture was stirred for 1 h at room temperature, and then concentrated under reduced pressure followed by purification with preparative RP-HPLC to obtain the *bis*-trifluoroacetate salt of the title compound **17** (8.30 mg, 10.8  $\mu\text{mol}$ , 11% in 3 steps) as freeze-dried powder:  $t_{\text{R}} = 22.5$  min and 22.8 min (linear gradient of B in A, 20 to 50% over 30 min);  $^1\text{H}$  NMR (500 MHz, MeOD): (mixture of diastereomers and rotamers)  $\delta$  0.89-0.92 (m, 3H), 1.17-3.22 (m, 28H), 3.41-4.38 (m, 9H), 6.96-7.11 (m, 1H, indole C5,C6-H), 7.13-7.23 (m, 1H, indole C5,C6-H), 7.29-7.65 (m, 3H, indole C2-H and C4,C7-H);  $^{13}\text{C}$   $\{^1\text{H}\}$  NMR (125 MHz, MeOD): (mixture of diastereomers and rotamers)  $\delta$  15.1, 15.2, 15.3, 23.7, 24.6, 26.6, 29.3, 30.3, 30.5, 32.1, 32.3, 32.9, 34.2, 39.6, 44.5, 45.2, 45.9, 46.7, 47.5, 65.7, 112.9, 119.7, 120.7, 123.4, 123.5, 124.8, 124.9, 138.7, 162.9, 175.7; HRMS (ESI),  $m/z$  calcd for  $\text{C}_{30}\text{H}_{48}\text{N}_5\text{O}_2\text{S}$   $[\text{M}+\text{H}]^+$  542.3523, found 542.3523. Anal. Calcd for  $\text{C}_{30}\text{H}_{47}\text{N}_5\text{O}_2\text{S}\cdot 2\text{TFA}$ : C, 53.05; H, 6.42; N, 9.10. Found: C, 53.14; H, 6.71; N, 8.74.

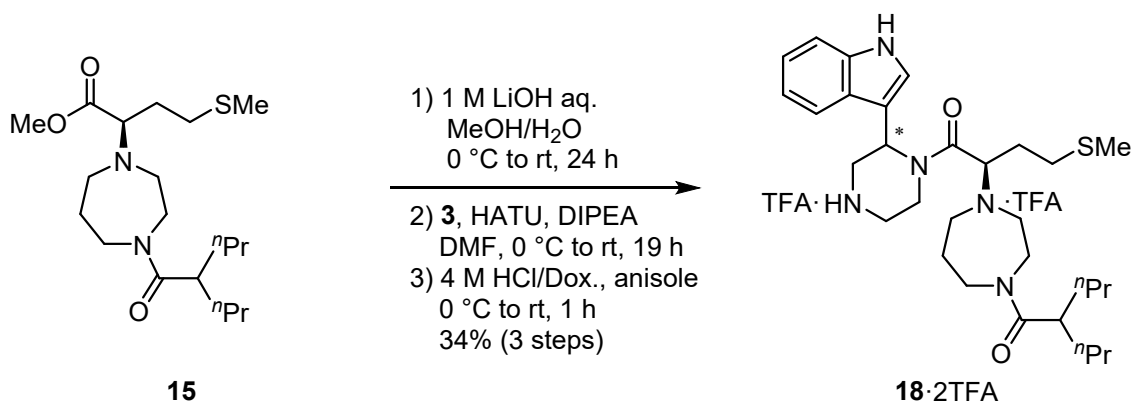

**1-(4-((2*R*)-1-(2-(1*H*-Indol-3-yl)piperazin-1-yl)-4-(methylthio)-1-oxobutan-2-yl)-1,4-diazepan-1-yl)octan-1-one·2TFA (**18·2TFA**):** To a solution of compound **15** (35.9 mg, 100  $\mu$ mol) in MeOH (1.00 mL) was added 1.00 M LiOH aq. (250  $\mu$ L, 250  $\mu$ mol) at 0 °C. The reaction mixture was stirred at room temperature for 24 h. The reaction was quenched by the addition of saturated aqueous NH<sub>4</sub>Cl and the mixture was extracted with CHCl<sub>3</sub>. The organic layer was dried over MgSO<sub>4</sub> and concentrated under reduced pressure to obtain the crude carboxylic acid. The crude carboxylic acid in DMF (1.00 mL) was added HATU (41.8 mg, 110  $\mu$ mol), DIPEA (105  $\mu$ L, 600  $\mu$ mol) and compound **3** (44.2 mg, 110  $\mu$ mol) at 0 °C. The reaction mixture was stirred at room temperature for 19 h. The reaction was quenched by the addition of saturated aqueous NH<sub>4</sub>Cl and the mixture was extracted with EtOAc. The organic layer was dried over MgSO<sub>4</sub> and concentrated under reduced pressure to obtain the crude amide. The crude amide and anisole (109  $\mu$ L, 1.00 mmol) in CH<sub>2</sub>Cl<sub>2</sub> (500  $\mu$ L) were added 4 M HCl/dioxane (500  $\mu$ L, 2.00 mmol) at 0 °C. The reaction mixture was stirred for 1 h at room temperature, and then concentrated under reduced pressure followed by purification with preparative RP-HPLC to obtain the *bis*-trifluoroacetate salt of the title compound **18** (26.4 mg, 34.0  $\mu$ mol, 34% in 3 steps) as freeze-dried powder:  $t_R$  = 20.0 min and 20.7 min (linear gradient of B in A, 20 to 50% over 30 min); <sup>1</sup>H NMR (500 MHz, MeOD): (mixture of diastereomers and rotamers)  $\delta$  0.72-1.02 (m, 6H), 1.09-3.29 (m, 25H), 3.35-4.53 (m, 9H), 6.99-7.13 (m, 1H, indole C5,C6-H), 7.14-7.26 (m, 1H, indole C5,C6-H), 7.32-7.66 (m, 3H, indole C2-H and C4,C7-H), 10.93 (br, 1H, indole N-H); <sup>13</sup>C {<sup>1</sup>H} NMR (125 MHz, MeOD): (mixture of diastereomers and rotamers)  $\delta$  14.6, 14.7, 21.8, 21.9, 27.7, 31.3, 36.4, 36.5, 39.7, 42.2, 44.1, 44.3, 45.0, 45.3, 45.9, 46.5, 46.9, 49.9, 54.2, 65.6, 112.9, 113.1, 119.7, 120.7, 123.5, 125.0, 126.7, 138.6, 162.8, 178.5; HRMS (ESI),  $m/z$  calcd for C<sub>30</sub>H<sub>48</sub>N<sub>5</sub>O<sub>2</sub>S [M+H]<sup>+</sup> 542.3523, found 542.3521. Anal. Calcd for C<sub>30</sub>H<sub>47</sub>N<sub>5</sub>O<sub>2</sub>S·2TFA: C, 53.05; H, 6.42; N, 9.10. Found: C, 50.38; H, 6.44; N, 8.67.



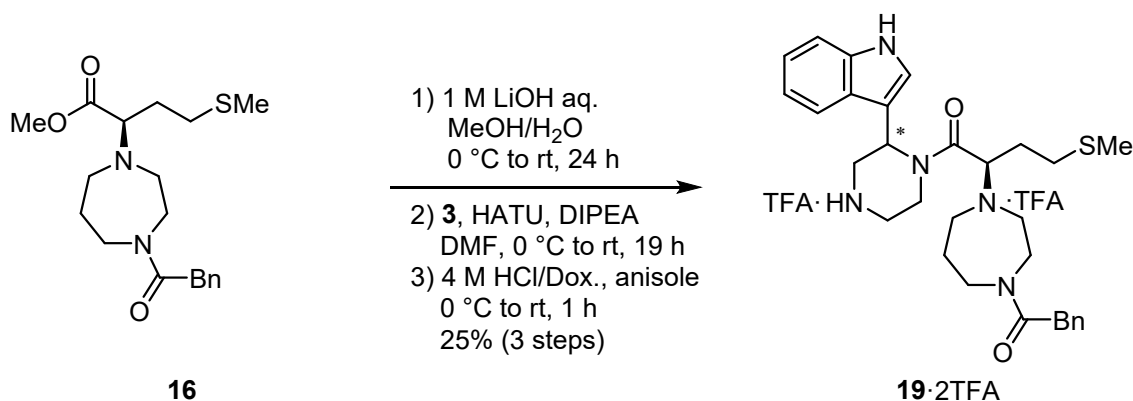

**(2R)-1-(2-(1*H*-Indol-3-yl)piperazin-1-yl)-4-(methylthio)-2-(4-(2-phenylacetyl)-1,4-diazepan-1-yl)butan-1-one·2TFA (19·2TFA):** To a solution of compound **16** (36.5 mg, 0.100 mmol) in MeOH (1.00 mL) was added 1.00 M LiOH aq. (250  $\mu$ L, 250  $\mu$ mol) at 0 °C. The reaction mixture was stirred at room temperature for 24 h. The reaction was quenched by the addition of saturated aqueous NH<sub>4</sub>Cl and the mixture was extracted with CHCl<sub>3</sub>. The organic layer was dried over MgSO<sub>4</sub> and concentrated under reduced pressure to obtain the crude carboxylic acid. The crude carboxylic acid in DMF (1.00 mL) was added HATU (41.8 mg, 110  $\mu$ mol), DIPEA (105  $\mu$ L, 600  $\mu$ mol) and **3** (44.2 mg, 110  $\mu$ mol) at 0 °C. The reaction mixture was stirred at room temperature for 19 h. The reaction was quenched by the addition of saturated aqueous NH<sub>4</sub>Cl and the mixture was extracted with EtOAc. The organic layer was dried over MgSO<sub>4</sub> and concentrated under reduced pressure to obtain the crude amide. The crude amide and anisole (109  $\mu$ L, 1.00 mmol) in CH<sub>2</sub>Cl<sub>2</sub> (500  $\mu$ L) were added 4 M HCl/dioxane (500  $\mu$ L, 2.00 mmol) at 0 °C. The reaction mixture was stirred for 1 h at room temperature, and then concentrated under reduced pressure followed by purification with preparative RP-HPLC to obtain the bis-trifluoroacetate salt of the title compound **32** (19.0 mg, 24.9  $\mu$ mol, 25% in 3 steps) as freeze-dried powder:  $t_R$  = 14.0 min (linear gradient of B in A, 20 to 50% over 30 min); <sup>1</sup>H NMR (500 MHz, MeOD): (mixture of diastereomers and rotamers)  $\delta$  1.45-3.29 (m, 15H), 3.36-4.56 (m, 12H), 6.96-7.67 (m, 10H, including indole C2~C6-H), 10.94 (br, 1H, indole N-H); <sup>13</sup>C{<sup>1</sup>H} NMR (125 MHz, MeOD): (mixture of diastereomers and rotamers)  $\delta$  15.0, 30.5, 31.0, 31.5, 39.7, 41.5, 44.2, 44.9, 45.9, 47.2, 47.5, 53.4, 54.6, 65.4, 113.0, 119.2, 119.8, 120.7, 121.2, 123.6, 125.0, 125.2, 128.1, 129.8, 130.0, 131.0, 136.3, 138.5, 162.8, 173.9; HRMS (ESI),  $m/z$  calcd for C<sub>30</sub>H<sub>40</sub>N<sub>5</sub>O<sub>2</sub>S [M+H]<sup>+</sup> 534.2897, found 534.2897. Anal. Calcd for C<sub>30</sub>H<sub>39</sub>N<sub>5</sub>O<sub>2</sub>S·2TFA: C, 53.61; H, 5.43; N, 9.19. Found: C, 51.74; H, 5.17; N, 9.05.

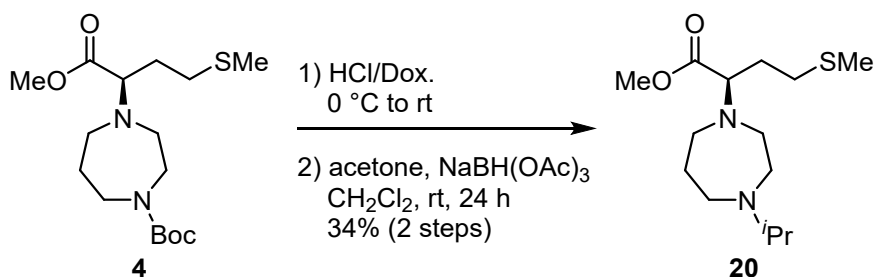

**Methyl (R)-2-(4-isopropyl-1,4-diazepan-1-yl)-4-(methylthio)butanoate (20):** The compound **4** (346 mg,

1.00 mmol) was added 4 M HCl/dioxane (5.00 mL, 20.0 mmol) at 0 °C. The reaction mixture was warmed to room temperature and stirred for 1 h. The reaction mixture was concentrated under reduced pressure to obtain the crude amine. The crude amine in CH<sub>2</sub>Cl<sub>2</sub> (10.0 mL) was added acetone (346 μL, 4.70 mmol) and NaBH(OAc)<sub>3</sub> (636 mg, 3.00 mmol) at room temperature. The reaction mixture was stirred at room temperature for 24 h. The reaction quenched by the addition of saturated aqueous NaHCO<sub>3</sub> and the mixture was extracted with CH<sub>2</sub>Cl<sub>2</sub>. The organic layer was dried over MgSO<sub>4</sub> and concentrated under reduced pressure. The crude mixture was purified by automated silica gel flush column chromatography system (Isolera One) with CHCl<sub>3</sub>/MeOH (92:8 to 66:34) to obtain the title compound **20** (98.1 mg, 34% in 2 steps) as colorless oil: <sup>1</sup>H NMR (500 MHz, CDCl<sub>3</sub>): δ 1.06 (d, *J* = 6.0 Hz, 6H), 1.83-2.02 (m, 5H), 2.10 (s, 3H), 2.57-2.61 (m, 2H), 2.70-2.79 (m, 5H), 2.87-2.93 (m, 2H), 3.04 (s, 1H), 3.45 (m, 1H), 3.69 (s, 3H); <sup>13</sup>C {<sup>1</sup>H} NMR (125 MHz, CDCl<sub>3</sub>): δ 15.6, 18.2, 18.3, 29.4, 31.2 (2C), 49.6, 50.6, 51.4, 52.4 (2C), 55.6, 66.3, 173.6; HRMS (ESI), *m/z* calcd for C<sub>14</sub>H<sub>29</sub>N<sub>2</sub>O<sub>2</sub>S [M+H]<sup>+</sup> 289.1944, found 289.1940.

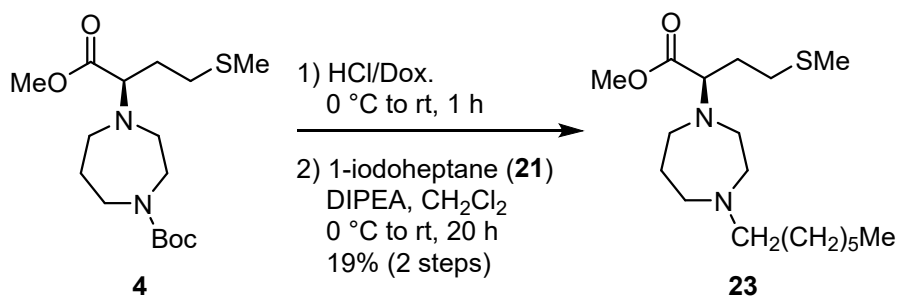

**Methyl (R)-2-(4-heptyl-1,4-diazepan-1-yl)-4-(methylthio)butanoate (23):** The compound **4** (346 mg, 1.00 mmol) were added 4 M HCl/dioxane (5.00 mL, 20.0 mmol) at 0 °C. The reaction mixture was stirred at room temperature for 1 h, and then concentrated under reduced pressure to obtain the crude amine. The crude amine in CH<sub>2</sub>Cl<sub>2</sub> (5.00 mL) was added DIPEA (697 μL, 4.00 mmol), 1-iodoheptane **21** (330 μL, 2.00 mmol) at room temperature. The reaction mixture was stirred at room temperature for 20 h. The reaction was quenched by the addition of saturated aqueous NH<sub>4</sub>Cl and the mixture was extracted with EtOAc. The organic layer was dried over MgSO<sub>4</sub> and concentrated under reduced pressure. The crude compound was purified by automated silica gel flush column chromatography system (Isolera One) with CHCl<sub>3</sub>/MeOH (99:1 to 90:10) to obtain the title compound **23** (66.4 mg, 19% in 2 steps) as a white solid: <sup>1</sup>H NMR (500 MHz, CDCl<sub>3</sub>): δ 0.88 (t, *J* = 7.0 Hz, 3H), 1.18-1.35 (m, 9H), 1.86-2.01 (m, 5H), 2.10 (s, 3H), 2.56-2.61 (m, 4H), 2.71-2.98 (m, 8H), 3.46-3.49 (m, 1H), 3.69 (s, 3H); <sup>13</sup>C {<sup>1</sup>H} NMR (125 MHz, CDCl<sub>3</sub>): δ 14.2, 15.6, 22.7, 27.6, 29.7 (2C), 31.2 (2C), 31.9 (2C), 51.5 (2C), 53.8, 57.0 (2C), 58.1, 66.1, 173.6; HRMS (ESI), *m/z* calcd for C<sub>18</sub>H<sub>37</sub>N<sub>2</sub>O<sub>2</sub>S [M+H]<sup>+</sup> 345.2570, found 345.2569.

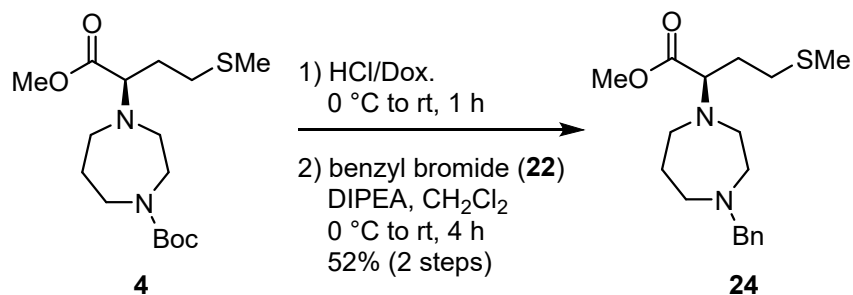

**Methyl (*R*)-2-(4-benzyl-1,4-diazepan-1-yl)-4-(methylthio)butanoate (**24**):** The compound **4** (173 mg, 0.500 mmol) was added 4 M HCl/dioxane (2.50 mL, 10.0 mmol) at 0 °C. The reaction mixture was stirred at room temperature for 1 h, and then concentrated under reduced pressure to obtain the crude amine. The crude amine in CH<sub>2</sub>Cl<sub>2</sub> (2.5 mL) was added DIPEA (348 μL, 2.00 mmol) and benzyl bromide **22** (59.0 μL, 600 μmol) at room temperature. The reaction mixture was stirred at room temperature for 4 h. The reaction mixture was added silica gel and evaporated under reduced pressure. The residue was purified by automated silica gel flush column chromatography system (Isolera One) with *n*-hexane/AcOEt/ (80:20 to 20:80) to obtain the title compound **24** (260 mg, 52% in 2 steps) as colorless oil: <sup>1</sup>H NMR (500 MHz, CDCl<sub>3</sub>): δ 1.77-1.80 (m, 2H), 1.86-2.01 (m, 2H), 2.10 (s, 3H), 2.59-2.78 (m, 8H), 2.89-2.94 (m, 2H), 3.45-3.48 (m, 1H), 3.65 (s, 2H), 3.69 (s, 3H), 7.22-7.34 (m, 5H); <sup>13</sup>C {<sup>1</sup>H} NMR (125 MHz, CDCl<sub>3</sub>): δ 15.6, 28.6, 29.4, 31.2, 50.8, 51.3, 51.5, 54.2, 57.1, 62.4, 66.2, 127.1, 128.3 (4C), 129.1, 173.8; HRMS (ESI), *m/z* calcd for C<sub>18</sub>H<sub>29</sub>N<sub>2</sub>O<sub>2</sub>S [M+H]<sup>+</sup> 337.1944, found 337.1940.

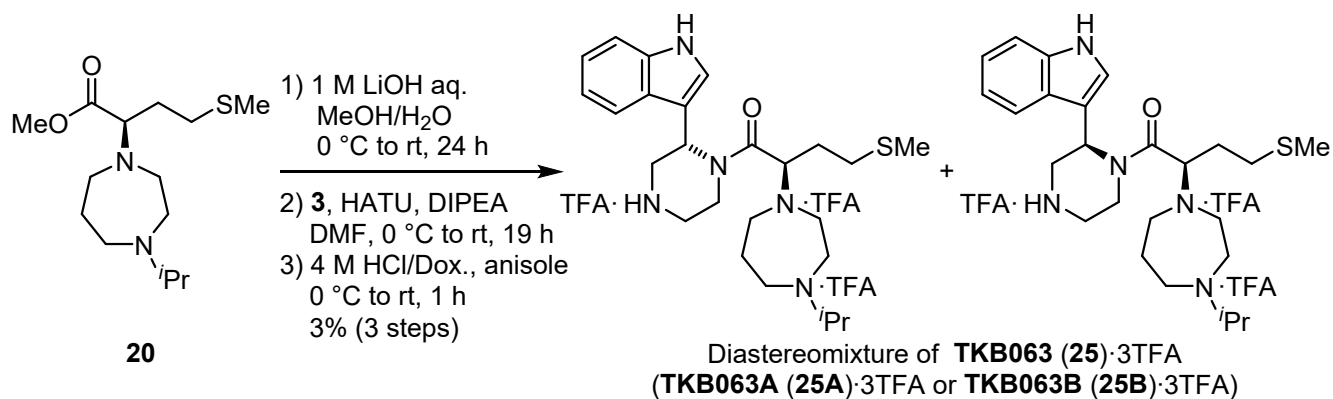

**(2*R*)-1-(2-(1*H*-Indol-3-yl)piperazin-1-yl)-2-(4-isopropyl-1,4-diazepan-1-yl)-4-(methylthio)butan-1-one·3TFA (**25**·3TFA, **TKB-063**·3TFA):** To a solution of compound **20** (28.9 mg, 100 μmol) in MeOH (1.00 mL) was added 1.00 M LiOH aq. (250 μL, 250 μmol) at 0 °C. The reaction mixture was stirred at room temperature for 24 h. The reaction was quenched by the addition of saturated aqueous NH<sub>4</sub>Cl and the mixture was extracted with CHCl<sub>3</sub>. The organic layer was dried over MgSO<sub>4</sub> and concentrated under reduced pressure to obtain the crude carboxylic acid. The crude carboxylic acid in DMF (1.00 mL) was added HATU (41.8 mg, 110 μmol), DIPEA (105 μL, 600 μmol) and compound **3** (44.2 mg, 110 μmol) at 0 °C. The reaction mixture was

warmed to room temperature and stirred for 19 h. The reaction was quenched by the addition of saturated aqueous  $\text{NH}_4\text{Cl}$  and the mixture was extracted with EtOAc. The organic layer was dried over  $\text{MgSO}_4$  and concentrated under reduced pressure to obtain the crude amide. The crude amide and anisole (109  $\mu\text{L}$ , 1.00 mmol) in  $\text{CH}_2\text{Cl}_2$  (500  $\mu\text{L}$ ) were added 4 M HCl/dioxane (500  $\mu\text{L}$ , 2.00 mmol) at 0  $^\circ\text{C}$ . The reaction mixture was stirred at room temperature for 1 h, and then concentrated under reduced pressure followed by purification with preparative RP-HPLC to obtain the *tris*-trifluoroacetate salt of the title compound **25** (2.40 mg, 2.98  $\mu\text{mol}$ , 3% in 3 steps) as freeze-dried powder:

**TKB063A (25A)**;  $t_{\text{R}} = 23.0$  min (linear gradient of B in A, 12 to 27% over 30 min);  $^1\text{H}$  NMR (500 MHz, MeOD): (mixture of rotamers)  $\delta$  0.77-3.13 (m, 26H), 3.39-3.71 (m, 4H), 3.90-4.21 (m, 2H), 6.96-7.17 (m, 1H, indole C5,C6-H), 7.18-7.28 (m, 1H, indole C5,C6-H), 7.33-7.53 (m, 2H, indole C2-H and C4,C7-H), 7.54-7.65 (m, 1H, indole C4,C7-H);  $^{13}\text{C}\{^1\text{H}\}$  NMR (125 MHz, MeOD): (mixture of rotamers)  $\delta$  15.4, 16.6, 25.3, 26.1, 30.8, 32.1, 32.3, 36.9, 39.6, 44.4, 53.0, 53.9, 60.2, 60.6, 64.4, 65.3, 113.4, 119.7, 121.1, 123.6, 124.9, 125.0, 126.5, 138.7, 162.3; HRMS (ESI),  $m/z$  calcd for  $\text{C}_{25}\text{H}_{40}\text{N}_5\text{OS}$   $[\text{M}+\text{H}]^+$  458.2948, found 458.2948. Anal. Calcd for  $\text{C}_{25}\text{H}_{39}\text{N}_5\text{OS}\cdot 3\text{TFA}$ : C, 46.56; H, 5.29; N, 8.76. Found: C, 46.10; H, 5.41; N, 8.19.

**TKB063B (25B)**;  $t_{\text{R}} = 24.7$  min (linear gradient of B in A, 12 to 27% over 30 min);  $^1\text{H}$  NMR (500 MHz, MeOD): (mixture of rotamers)  $\delta$  0.77-3.16 (m, 25H), 3.36-3.71 (m, 5H), 3.81-4.16 (m, 2H), 7.07 (t,  $J = 7.4$  Hz, 1H, indole C5,C6-H), 7.15-7.25 (m, 1H, indole C5,C6-H), 7.43 (d,  $J = 8.1$  Hz, 1H, indole C2-H), 7.48-7.60 (m, 1H, indole C4,C7-H), 7.61-7.78 (m, 1H, indole C4,C7-H);  $^{13}\text{C}\{^1\text{H}\}$  NMR (125 MHz, MeOD): (mixture of rotamers)  $\delta$  15.1, 17.2, 24.3, 26.6, 30.8, 32.1, 39.4, 44.7, 45.2, 46.5, 47.3, 50.7, 52.0, 52.6, 60.5, 63.9, 111.6, 113.0, 120.7, 123.6, 125.1, 125.2, 127.3, 138.6, 162.5; HRMS (ESI),  $m/z$  calcd for  $\text{C}_{25}\text{H}_{40}\text{N}_5\text{OS}$   $[\text{M}+\text{H}]^+$  458.2948, found 458.2946. Anal. Calcd for  $\text{C}_{25}\text{H}_{39}\text{N}_5\text{OS}\cdot 3\text{TFA}$ : C, 46.56; H, 5.29; N, 8.76. Found: C, 47.34; H, 5.49; N, 8.67.

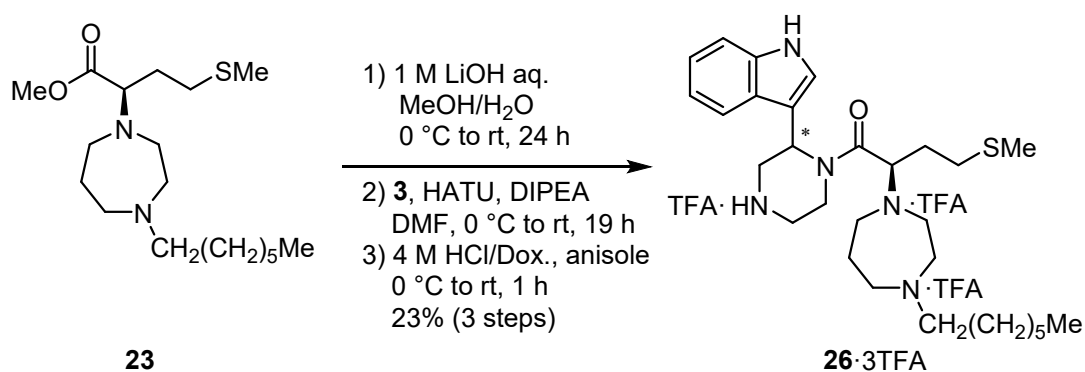

**(2R)-1-(2-(1H-Indol-3-yl)piperazin-1-yl)-2-(4-heptyl-1,4-diazepan-1-yl)-4-(methylthio)butan-1-one·3TFA (26·3TFA)**: To a solution of compound **23** (34.5 mg, 100  $\mu\text{mol}$ ) in MeOH (1.00 mL) was added 1.00 M LiOH aq. (250  $\mu\text{L}$ , 0.250 mmol) at 0  $^\circ\text{C}$ . The reaction mixture was stirred at room temperature for 24 h. The reaction was quenched by the addition of saturated aqueous  $\text{NH}_4\text{Cl}$  and the mixture was extracted with  $\text{CHCl}_3$ . The organic layer was dried over  $\text{MgSO}_4$  and concentrated under reduced pressure to obtain the crude carboxylic acid. The crude carboxylic acid in DMF (1.00 mL) was added HATU (41.8 mg, 110  $\mu\text{mol}$ ), DIPEA (105  $\mu\text{L}$ , 600  $\mu\text{mol}$ ) and compound **3** (44.2 mg, 110  $\mu\text{mol}$ ) at 0  $^\circ\text{C}$ . The reaction mixture was stirred at room temperature

for 19 h. The reaction was quenched by the addition of saturated aqueous  $\text{NH}_4\text{Cl}$  and the mixture was extracted with EtOAc. The organic layer was dried over  $\text{MgSO}_4$  and concentrated under reduced pressure to obtain the crude amide. The crude amide and anisole (109  $\mu\text{L}$ , 1.00 mmol) in  $\text{CH}_2\text{Cl}_2$  (500  $\mu\text{L}$ ) were added 4 M HCl/dioxane (500  $\mu\text{L}$ , 2.00 mmol) at 0  $^\circ\text{C}$ . The reaction mixture was warmed to room temperature and stirred for 1 h. The reaction mixture was concentrated under reduced pressure followed by purification with preparative RP-HPLC to obtain the *tris*-trifluoroacetate salt of the title compound **26** (22.8 mg, 22.8  $\mu\text{mol}$ , 23% in 3 steps) as freeze-dried powder:  $t_{\text{R}} = 19.7$  min and 20.6 min (linear gradient of B in A, 25 to 45% over 40 min);  $^1\text{H}$  NMR (500 MHz, MeOD): (mixture of diastereomers and rotamers)  $\delta$  0.93 (t,  $J = 13.5$  Hz, 3H), 1.05-1.48 (m, 10H), 1.50-3.28 (m, 20H), 3.34-4.24 (m, 7H), 7.07 (t,  $J = 7.2$  Hz, 1H, indole C5,C6-H), 7.18 (t,  $J = 7.6$  Hz, 1H, indole C5,C6-H), 7.30-7.72 (m, 3H, indole C2-H and C4,C7-H), 10.95 (br, 1H, indole N-H);  $^{13}\text{C}\{^1\text{H}\}$  NMR (125 MHz, MeOD): (mixture of diastereomers and rotamers)  $\delta$  14.4, 15.3, 23.6, 25.4, 26.0, 27.5, 29.9, 32.1, 32.7, 36.9, 39.5, 44.5, 45.2, 46.7, 52.0, 52.9, 54.2, 57.4, 58.8, 63.8, 112.9, 117.1, 119.8, 120.6, 123.5, 125.1, 126.5, 138.6, 163.3; HRMS (ESI),  $m/z$  calcd for  $\text{C}_{29}\text{H}_{48}\text{N}_5\text{OS}$   $[\text{M}+\text{H}]^+$  514.3574, found 514.3571. Anal. Calcd for  $\text{C}_{29}\text{H}_{47}\text{N}_5\text{OS}\cdot 3\text{TFA}$ : C, 49.12; H, 5.89; N, 8.18. Found: C, 49.35; H, 6.26; N, 8.71.

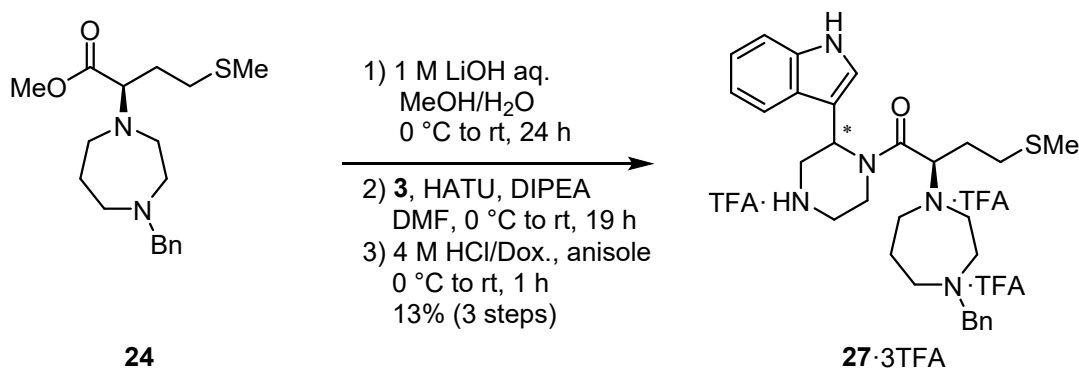

**(2R)-1-(2-(1*H*-Indol-3-yl)piperazin-1-yl)-2-(4-benzyl-1,4-diazepan-1-yl)-4-(methylthio)butan-1-one·3TFA (27·3TFA)**: To a solution of compound **24** (33.6 mg, 100  $\mu\text{mol}$ ) in MeOH (1.00 mL) was added 1.00 M LiOH aq. (250  $\mu\text{L}$ , 250  $\mu\text{mol}$ ) at 0  $^\circ\text{C}$ . The reaction mixture was stirred at room temperature for 24 h. The reaction was quenched by the addition of saturated aqueous  $\text{NH}_4\text{Cl}$  and the mixture was extracted with  $\text{CHCl}_3$ . The organic layer was dried over  $\text{MgSO}_4$  and concentrated under reduced pressure to obtain the crude carboxylic acid. The crude carboxylic acid in DMF (1.00 mL) was added HATU (41.8 mg, 110  $\mu\text{mol}$ ), DIPEA (105  $\mu\text{L}$ , 600  $\mu\text{mol}$ ) and compound **3** (44.2 mg, 110  $\mu\text{mol}$ ) at 0  $^\circ\text{C}$ . The reaction mixture was stirred at room temperature for 19 h. The reaction was quenched by the addition of saturated aqueous  $\text{NH}_4\text{Cl}$  and the mixture was extracted with EtOAc. The organic layer was dried over  $\text{MgSO}_4$  and concentrated under reduced pressure to obtain the crude amide. The crude amide and anisole (109  $\mu\text{L}$ , 1.00 mmol) in  $\text{CH}_2\text{Cl}_2$  (500  $\mu\text{L}$ ) were added 4 M HCl/dioxane (500  $\mu\text{L}$ , 2.00 mmol) at 0  $^\circ\text{C}$ . The reaction mixture was stirred at room temperature for 1 h, and then concentrated under reduced pressure followed by purification with preparative RP-HPLC to obtain the *tris*-trifluoroacetate salt of the title compound **27** (10.9 mg, 12.9  $\mu\text{mol}$ , 13% in 3 steps) as freeze-dried powder:  $t_{\text{R}} = 12.9$  min and 13.3 min (linear gradient of B in A, 20 to 50% over 30 min);  $^1\text{H}$  NMR (500 MHz, MeOD): (mixture

of diastereomers and rotamers)  $\delta$  1.23-3.28 (m, 17H), 3.34-4.53 (m, 10H), 6.94-7.67 (m, 10H, including indole C2~C6-H), 10.95 (br, 1H, indole N-H);  $^{13}\text{C}\{^1\text{H}\}$  NMR (125 MHz, MeOD): (mixture of diastereomers and rotamers)  $\delta$  15.1, 15.3, 25.4, 25.8, 32.1, 36.9, 39.5, 44.5, 45.9, 45.1, 46.5, 51.6, 52.5, 53.8, 57.3, 57.5, 61.8, 63.7, 71.4, 110.6, 111.8, 113.0, 119.9, 120.7, 123.6, 125.0, 126.6, 126.9, 130.4, 131.2, 132.0, 132.2, 138.6, 163.0; HRMS (ESI),  $m/z$  calcd for  $\text{C}_{29}\text{H}_{40}\text{N}_5\text{OS}$   $[\text{M}+\text{H}]^+$  506.2948, found 506.2949. Anal. Calcd for  $\text{C}_{29}\text{H}_{39}\text{N}_5\text{OS}\cdot 3\text{TFA}$ : C, 49.59; H, 4.99; N, 8.26. Found: C, 48.76; H, 5.04; N, 7.79.

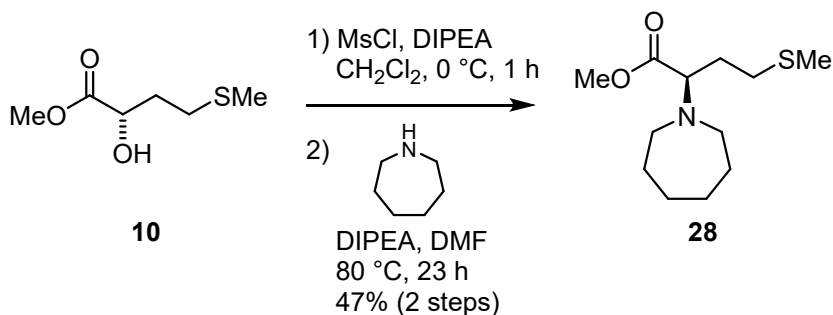

**Methyl (R)-2-(azepan-1-yl)-4-(methylthio)butanoate (28):** To a solution of compound **10** (328 mg, 2.00 mmol) and DIPEA (1.05 mL, 6.00 mmol) in CH<sub>2</sub>Cl<sub>2</sub> (10.0 mL) was added MsCl (263  $\mu\text{L}$ , 3.00 mmol) at 0 °C. The reaction mixture was stirred at room temperature for 1 h. The reaction was quenched by the addition of saturated aqueous NH<sub>4</sub>Cl and the mixture was extracted with CH<sub>2</sub>Cl<sub>2</sub>. The organic layer was dried over MgSO<sub>4</sub> and concentrated under reduced pressure to obtain the crude mesylate. The crude mesylate and DIPEA (1.05 mL, 6.00 mmol) in DMF (4.00 mL) was added hexamethylenimine (451  $\mu\text{L}$ , 4.00 mmol) at room temperature. The reaction mixture was stirred at 80 °C for 23 h. The reaction was quenched by the addition of saturated aqueous NH<sub>4</sub>Cl and the mixture was extracted with EtOAc. The organic layer was dried over MgSO<sub>4</sub> and concentrated under reduced pressure followed by purification using automated silica gel flush column chromatography system (Isolera One) with *n*-hexane/AcOEt (92:8 to 90:10) to obtain the title compound **28** (231 mg, 47% in 2 steps) as colorless oil:  $^1\text{H}$  NMR (500 MHz, CDCl<sub>3</sub>):  $\delta$  1.57-1.63 (m, 8H), 1.88-1.98 (m, 2H), 2.11 (s, 3H), 2.58-2.67 (m, 4H), 2.80-2.84 (m, 2H), 3.43-3.46 (m, 1H), 3.68 (s, 3H);  $^{13}\text{C}\{^1\text{H}\}$  NMR (125 MHz, CDCl<sub>3</sub>):  $\delta$  15.6, 27.2 (2C), 29.7, 30.0 (2C), 31.2, 51.2, 52.1 (2C), 66.7, 174.1; HRMS (ESI),  $m/z$  calcd for  $\text{C}_{12}\text{H}_{24}\text{NO}_2\text{S}$   $[\text{M}+\text{H}]^+$  246.1522, found 246.1526.

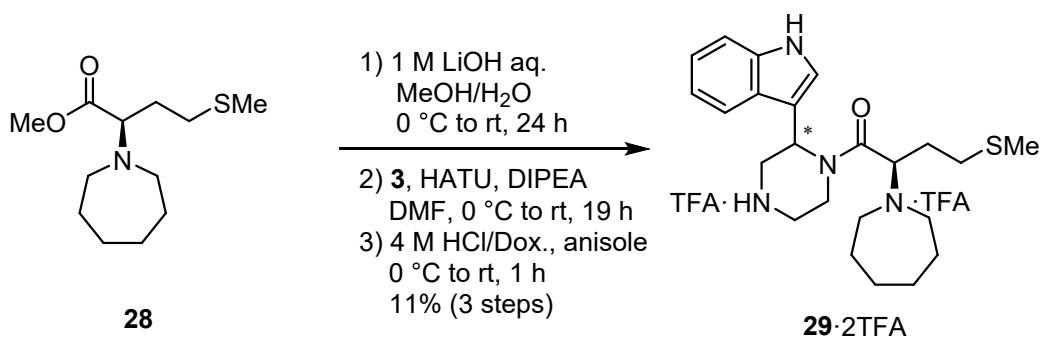

**(2R)-1-(2-(1*H*-Indol-3-yl)piperazin-1-yl)-2-(azepan-1-yl)-4-(methylthio)butan-1-one·2TFA (29·2TFA)**: To a solution of compound **28** (24.5 mg, 100  $\mu$ mol) in MeOH (1.00 mL) was added 1.00 M LiOH aq. (250  $\mu$ L, 250  $\mu$ mol) at 0 °C. The reaction mixture was stirred at room temperature for 24 h. The reaction was quenched by the addition of saturated aqueous NH<sub>4</sub>Cl and the mixture was extracted with CHCl<sub>3</sub>. The organic layer was dried over MgSO<sub>4</sub> and concentrated under reduced pressure to obtain the crude carboxylic acid. The crude carboxylic acid in DMF (1.00 mL) was added HATU (41.8 mg, 110  $\mu$ mol), DIPEA (105  $\mu$ L, 600  $\mu$ mol) and compound **3** (44.2 mg, 110  $\mu$ mol) at 0 °C. The reaction mixture was stirred at room temperature for 19 h. The reaction was quenched by the addition of saturated aqueous NH<sub>4</sub>Cl and the mixture was extracted with EtOAc. The organic layer was dried over MgSO<sub>4</sub> and concentrated under reduced pressure to obtain the crude amide. The crude amide and anisole (109  $\mu$ L, 1.00 mmol) in CH<sub>2</sub>Cl<sub>2</sub> (500  $\mu$ L) were added 4 M HCl/dioxane (500  $\mu$ L, 2.00 mmol) at 0 °C. The reaction mixture was stirred for 1 h at room temperature, and then concentrated under reduced pressure followed by purification with preparative RP-HPLC to obtain the *bis*-trifluoroacetate salt of the title compound **29** (7.10 mg, 11.0  $\mu$ mol, 11% in 3 steps) as freeze dried powder:  $t_R$  = 17.4 min and 18.5 min (linear gradient of B in A, 15 to 35% over 40 min); <sup>1</sup>H NMR (500 MHz, MeOD): (mixture of diastereomers and rotamers)  $\delta$  0.81-3.25 (m, 19H), 3.40-4.81 (m, 8H), 7.02-7.15 (m, 1H, indole C5,C6-H), 7.16-7.28 (m, 1H, indole C5,C6-H), 7.37-7.52 (m, 1H, indole C2-H), 7.53-7.70 (m, 2H, indole C4,C7-H); <sup>13</sup>C{<sup>1</sup>H} NMR (125 MHz, MeOD): (mixture of diastereomers and rotamers)  $\delta$  14.9, 25.0, 25.1, 27.4, 28.0, 29.4, 37.5, 39.8, 43.7, 44.8, 45.9, 46.3, 47.4, 65.3, 110.4, 112.9, 123.7, 123.9, 125.0, 125.1, 126.9, 138.3, 167.7; HRMS (ESI),  $m/z$  calcd for C<sub>23</sub>H<sub>35</sub>N<sub>4</sub>OS [M+H]<sup>+</sup> 415.2526, found 415.2529. Anal. Calcd for C<sub>23</sub>H<sub>34</sub>N<sub>4</sub>OS·2TFA: C, 50.46; H, 5.65; N, 8.72. Found: C, 46.70; H, 5.14; N, 7.47.

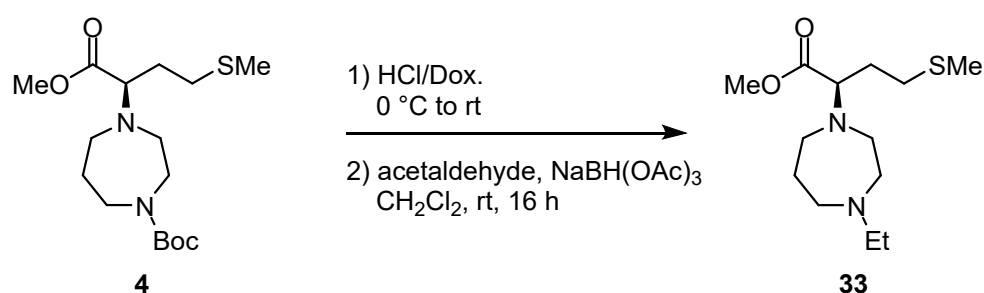

**Methyl (R)-2-(4-ethyl-1,4-diazepan-1-yl)-4-(methylthio)butanoate (33)**: The compound **4** (193 mg, 557  $\mu$ mol) was added 4 M HCl/dioxane (2.75 mL, 11 mmol) at 0 °C. The reaction mixture was stirred at room temperature for 3 h, and then concentrated under reduced pressure to obtain the crude amine. The crude amine in CH<sub>2</sub>Cl<sub>2</sub> (5.50 mL) was added acetaldehyde (147  $\mu$ L, 2.59 mmol) and NaBH(OAc)<sub>3</sub> (350 mg, 1.65 mmol) at room temperature. The reaction mixture was stirred at room temperature for 16 h. The reaction was quenched by the addition of saturated aqueous NaHCO<sub>3</sub> and the mixture was extracted with CH<sub>2</sub>Cl<sub>2</sub>. The organic layer was dried over MgSO<sub>4</sub> and concentrated under reduced pressure. The crude compound **33** was used immediately in next step without purification.

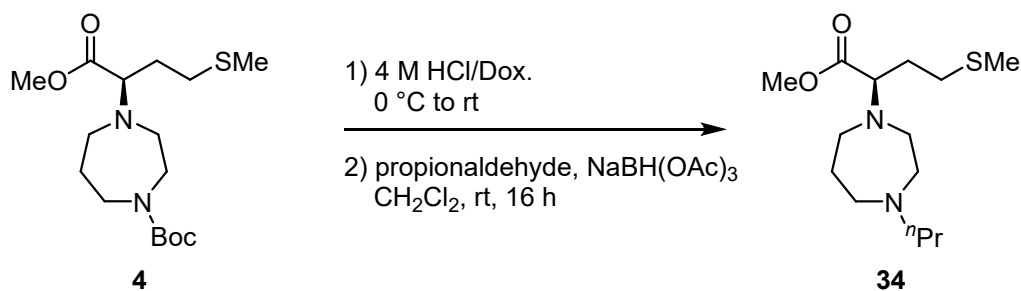

**Methyl (R)-4-(methylthio)-2-(4-propyl-1,4-diazepan-1-yl)butanoate (34):** The compound **4** (122 mg, 352  $\mu$ mol) was added 4 M HCl/dioxane (721  $\mu$ L, 2.88 mmol) at 0 °C. The reaction mixture was stirred at room temperature for 3 h, and then concentrated under reduced pressure to obtain the crude amine. The crude amine in CH<sub>2</sub>Cl<sub>2</sub> (3.52 mL) was added propionaldehyde (120  $\mu$ L, 677  $\mu$ mol) and NaBH(OAc)<sub>3</sub> (223.8 mg, 432  $\mu$ mol) at room temperature. The reaction mixture was stirred at room temperature for 16 h. The reaction was quenched by the addition of saturated aqueous NaHCO<sub>3</sub> and the mixture was extracted with CH<sub>2</sub>Cl<sub>2</sub>. The organic layer was dried over MgSO<sub>4</sub> and concentrated under reduced pressure. The crude compound **34** was used immediately in next step without purification.

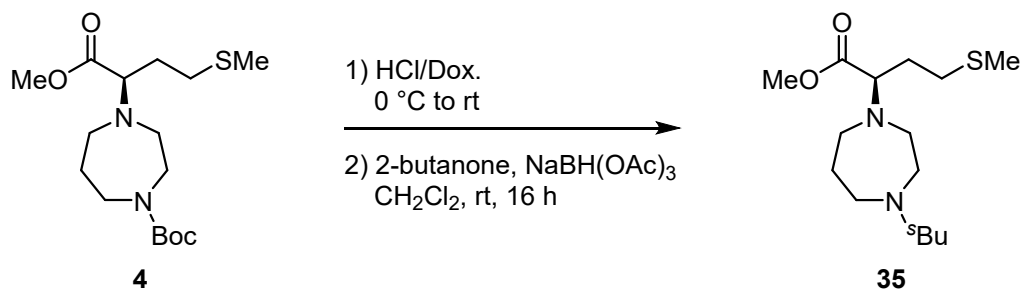

**Methyl (2R)-2-(4-(sec-butyl)-1,4-diazepan-1-yl)-4-(methylthio)butanoate (35):** The compound **4** (194 mg, 560  $\mu$ mol) was added 4 M HCl/dioxane (11.2 mL, 2.80 mmol) at 0 °C. The reaction mixture was stirred at room temperature for 3 h, and then concentrated under reduced pressure to obtain the crude amine. The crude amine in CH<sub>2</sub>Cl<sub>2</sub> (5.60 mL) was added 2-butanone (236  $\mu$ L, 2.63 mmol) and NaBH(OAc)<sub>3</sub> (356 mg, 1.68 mmol) at room temperature. The reaction mixture was stirred at room temperature for 17 h. The reaction was quenched by the addition of saturated aqueous NaHCO<sub>3</sub> and the mixture was extracted with CH<sub>2</sub>Cl<sub>2</sub>. The organic layer was dried over MgSO<sub>4</sub> and concentrated under reduced pressure. The crude compound **35** was used immediately in next step without purification.



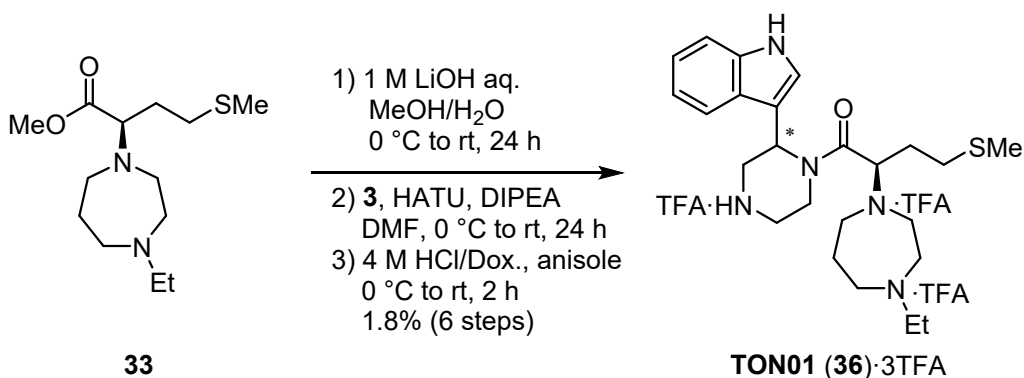

**(2R)-1-(2-(1H-Indol-3-yl)piperazin-1-yl)-2-(4-benzyl-1,4-diazepan-1-yl)-4-(methylthio)butan-1-one·3TFA (36·3TFA, TON01·3TFA):** To a solution of compound **33** (84 mg, 100  $\mu$ mol) in MeOH (3.00 mL) were added 1.00 M LiOH aq. (760  $\mu$ L, 0.765 mmol) at 0 °C. The reaction mixture was stirred at room temperature for 24 h. The reaction was quenched by the addition of saturated aqueous NH<sub>4</sub>Cl and the mixture was extracted with CHCl<sub>3</sub>. The organic layer was dried over MgSO<sub>4</sub> and concentrated under reduced pressure to obtain the crude carboxylic acid. The crude carboxylic acid in DMF (1.40 mL) was added HATU (53.2 mg, 0.139 mmol), DIPEA (133  $\mu$ L, 761  $\mu$ mol) and compound **3** (56.2 mg, 139  $\mu$ mol) at 0 °C. The reaction mixture was stirred at room temperature for 24 h. The reaction was quenched by the addition of saturated aqueous NH<sub>4</sub>Cl and the mixture was extracted with EtOAc. The organic layer was dried over MgSO<sub>4</sub> and concentrated under reduced pressure to obtain the crude amide. The crude amide and anisole (228  $\mu$ L, 1.27 mmol) in CH<sub>2</sub>Cl<sub>2</sub> (635  $\mu$ L) were added 4 M HCl/dioxane (635  $\mu$ L, 2.54 mmol) at 0 °C. The reaction mixture was stirred for 2 h at room temperature, and then concentrated under reduced pressure followed by purification with preparative RP-HPLC to obtain the *tris*-trifluoroacetate salt of the title compound **36** (8.02 mg, 10.2  $\mu$ mol, 1.8% in 5 steps) as freeze-dried powder:  $t_R$  = 19.2 min and 20.2 min (linear gradient of B in A, 17 to 37% over 40 min); <sup>1</sup>H NMR (500 MHz, MeOD): (mixture of diastereomers and rotamers)  $\delta$  0.81-1.47 (m, 3H), 1.56-2.40 (m, 6H), 2.41-2.73 (m, 2H), 2.74-3.71 (m, 17H), 3.87-4.26 (m, 2H), 7.07 (t,  $J$  = 7.2 Hz, 1H, indole C5,C6-H), 7.19 (t,  $J$  = 7.7 Hz, 1H, indole C5,C6-H), 7.31-7.72 (m, 3H, indole C2-H and C4,C7-H), 10.9 (br, 1H, indole N-H); <sup>13</sup>C {<sup>1</sup>H} NMR (125 MHz, MeOD): (mixture of diastereomers and rotamers)  $\delta$  8.49, 13.7, 13.9, 24.6, 24.9, 30.6, 35.5, 38.0, 43.6, 45.3, 50.6, 52.4, 55.3, 60.1, 62.4, 111.5, 117.3, 118.3, 119.2, 122.1, 123.6, 125.1, 137.2, 161.2; HRMS (ESI),  $m/z$  calcd for C<sub>24</sub>H<sub>38</sub>N<sub>5</sub>OS [M+H]<sup>+</sup> 444.2792, found 444.2796.

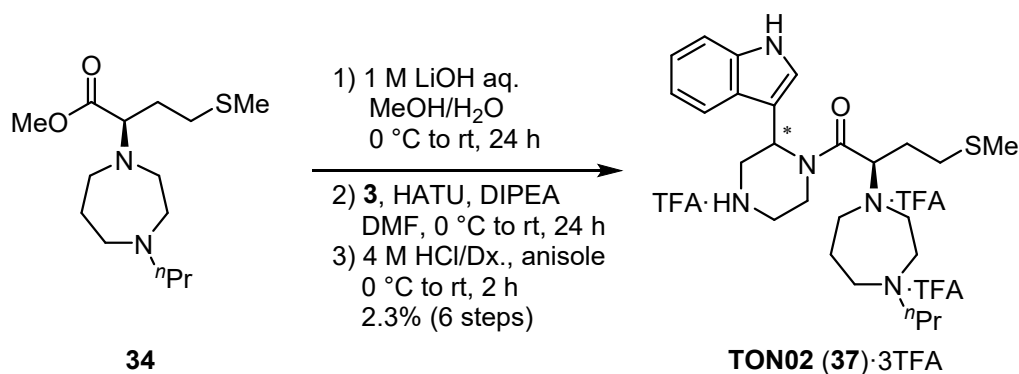

**(2R)-1-(2-(1*H*-Indol-3-yl)piperazin-1-yl)-4-(methylthio)-2-(4-propyl-1,4-diazepan-1-yl)butan-1-one·3TFA (37·3TFA, TON02·3TFA):** To a solution of compound **34** (71.3 mg, 247  $\mu$ mol) in MeOH (2.50 mL) was added 1.00 M LiOH aq. (618  $\mu$ L, 618  $\mu$ mol) at 0 °C. The reaction mixture was stirred at room temperature for 24 h. The reaction was quenched by the addition of saturated aqueous NH<sub>4</sub>Cl and the mixture was extracted with CHCl<sub>3</sub>. The organic layer was dried over MgSO<sub>4</sub> and concentrated under reduced pressure to obtain the crude carboxylic acid. The crude carboxylic acid in DMF (1.40 mL) was added HATU (152.5 mg, 401  $\mu$ mol), DIPEA (382  $\mu$ L, 2.19 mmol) and compound **3** (161.0 mg, 401  $\mu$ mol) at 0 °C. The reaction mixture was stirred at room temperature for 17 h. The reaction was quenched by the addition of saturated aqueous NH<sub>4</sub>Cl and the mixture was extracted with EtOAc. The organic layer was dried over MgSO<sub>4</sub> and concentrated under reduced pressure to obtain the crude amide. The crude amide and anisole (397  $\mu$ L, 3.65 mmol) in CH<sub>2</sub>Cl<sub>2</sub> (3.65 mL) was added 4 M HCl/dioxane (7.32 mL, 2.54 mmol) at 0 °C. The reaction mixture was stirred at room temperature for 2 h, and then concentrated under reduced pressure followed by purification with preparative RP-HPLC to obtain the *tris*-trifluoroacetate salt of the title compound **37** (6.52 mg, 8.15  $\mu$ mol, 2.3% in 5 steps) as freeze-dried powder:  $t_R$  = 21.4 min and 22.6 min (linear gradient of B in A, 10 to 70% over 60 min); <sup>1</sup>H NMR (500 MHz, MeOD): (mixture of diastereomers and rotamers)  $\delta$  0.72-1.15 (m, 2H), 1.16-1.52 (m, 1H), 1.55-2.37 (m, 10H), 2.41-2.76 (m, 3H), 2.77-3.30 (m, 8H), 3.37-3.78 (m, 6H), 3.89-4.36 (m, 3H), 6.97-7.14 (m, 1H, indole C5,C6-H), 7.15-7.30 (m, 1H, indole C5,C6-H), 7.33-7.76 (m, 3H, indole C2-H and C4,C7-H); <sup>13</sup>C {<sup>1</sup>H} NMR (125 MHz, MeOD): (mixture of diastereomers and rotamers)  $\delta$  9.59, 13.8, 17.5, 24.1, 30.5, 35.6, 38.2, 43.1, 43.7, 45.8, 49.4, 50.1, 52.9, 55.5, 58.8, 62.9, 111.5, 114.7, 116.7, 118.3, 119.2, 122.1, 123.6, 137.1, 159.8; HRMS (ESI),  $m/z$  calcd for C<sub>25</sub>H<sub>40</sub>N<sub>5</sub>OS [M+H]<sup>+</sup> 458.2948, found 458.2946.

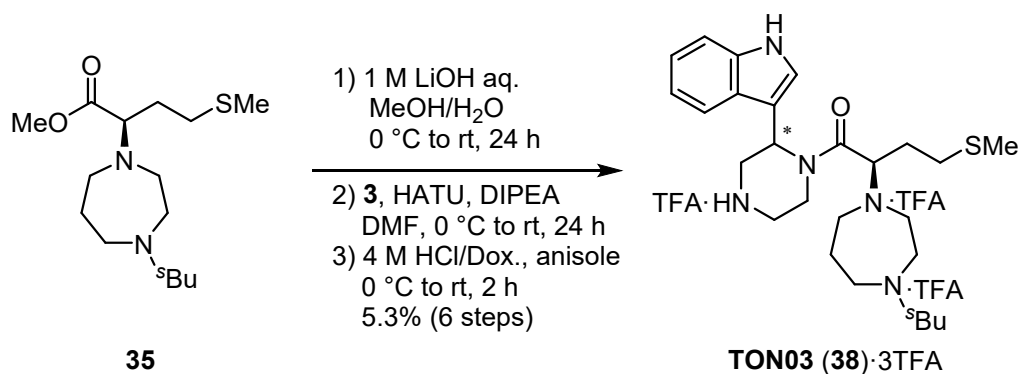

**(2R)-1-(2-(1*H*-Indol-3-yl)piperazin-1-yl)-2-(4-(*sec*-butyl)-1,4-diazepan-1-yl)-4-(methylthio)butan-1-one·3TFA (**38**·3TFA, **TON03**·3TFA):** To a solution of compound **35** (70.0 mg, 232  $\mu$ mol) in MeOH (2.30 mL) was added 1.00 M LiOH aq. (579  $\mu$ L, 579  $\mu$ mol) at 0 °C. The reaction mixture was stirred at room temperature for 24 h. The reaction was quenched by the addition of saturated aqueous NH<sub>4</sub>Cl and the mixture was extracted with CHCl<sub>3</sub>. The organic layer was dried over MgSO<sub>4</sub> and concentrated under reduced pressure to obtain the crude carboxylic acid. The crude carboxylic acid in DMF (1.00 mL) was added HATU (79.1 mg, 208  $\mu$ mol), DIPEA (181  $\mu$ L, 1.04 mmol) and compound **3** (83.5 mg, 208  $\mu$ mol) at 0 °C. The reaction mixture was stirred at room temperature for 24 h. The reaction was quenched by the addition of saturated aqueous NH<sub>4</sub>Cl and the mixture was extracted with EtOAc. The organic layer was dried over MgSO<sub>4</sub> and concentrated under reduced pressure to obtain the crude amide. The crude amide and anisole (188  $\mu$ L, 1.73 mmol) in CH<sub>2</sub>Cl<sub>2</sub> (865  $\mu$ L) were added 4 M HCl/dioxane (865  $\mu$ L, 3.46 mmol) at 0 °C. The reaction mixture was stirred at room temperature for 2 h, and then concentrated under reduced pressure followed by purification with preparative RP-HPLC to obtain the *tris*-trifluoroacetate salt of the title compound **38** (23.9 mg, 29.4  $\mu$ mol, 5.3% in 5 steps) as freeze dried powder:  $t_R$  = 23.7 min, 24.9 min (linear gradient of B in A, 17 to 37% over 40 min); <sup>1</sup>H NMR (400 MHz, MeOD): (mixture of diastereomers and rotamers)  $\delta$  0.57-3.27 (m, 27H), 3.32-3.92 (m, 5H), 3.99-4.23 (m, 2H), 7.06 (t,  $J$  = 7.6 Hz, 1H, indole C5,C6-H), 7.19 (t,  $J$  = 7.3, 1H, indole C5,C6-H), 7.43 (d,  $J$  = 8.2 Hz, 1H, indole C2-H), 7.49-7.59 (m, 1H, indole C4,C7-H), 7.50-7.73 (m, 1H, indole C4,C7-H); <sup>13</sup>C{<sup>1</sup>H} NMR (125 MHz, MeOD): (mixture of diastereomers and rotamers)  $\delta$  10.8, 15.4, 24.2, 25.4, 25.8, 26.6, 32.2, 37.0, 39.5, 44.7, 45.4, 46.5, 47.7, 53.4, 55.3, 64.2, 66.5, 113.1, 116.5, 118.8, 120.9, 123.8, 125.3, 127.5, 138.9, 161.9; HRMS (ESI),  $m/z$  calcd for C<sub>26</sub>H<sub>42</sub>N<sub>5</sub>OS [M+H]<sup>+</sup> 472.3105, found 472.3106.

### III. References

<sup>1</sup>Fredrich, S.; Bonasera, A.; Valderrey, V.; Hecht, S. Sensitive Assays by Nucleophile-Induced Rearrangement of Photoactivated Diarylethenes. *J. Am. Chem. Soc.* **2018**, *140*, 6432–6440.

<sup>2</sup>Luescher, M. U.; Vo, C.-V. T.; Bode, J. W. SnAP Reagents for the Synthesis of Piperazines and Morpholines.

*Org. Lett.* **2014**, *16*, 1236–1239.

<sup>3</sup>Griesbeck, A. G.; Heckroth, H. Stereoselective synthesis of 2-aminocyclobutanols via photocyclization of  $\alpha$ -amido alkylaryl ketones: Mechanistic implications for the Norrish/Yang reaction. *J. Am. Chem. Soc.* **2002**, *124*, 396–403.

### IV. <sup>1</sup>H NMR and <sup>13</sup>C NMR charts (compounds 25A, 25B and 38)

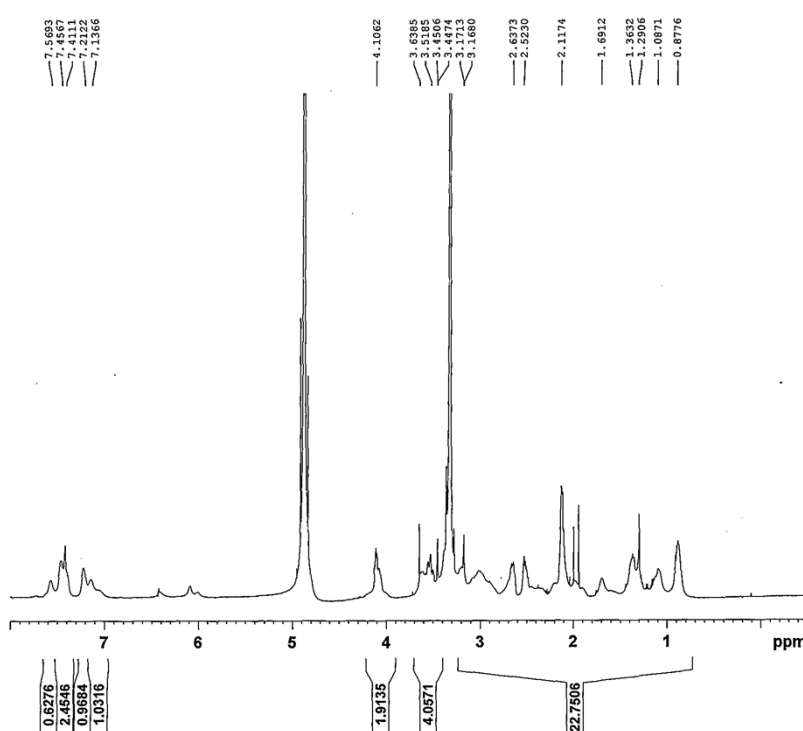

```

NAME           MKU-1614
EXPNO          3
PROCNO         1
Date_          20191126
Time           12.57
INSTRUM        av500
PROBHD         5 mm CPDCH 13C
PULPROG        zg30
TD              65536
SOLVENT        MeOD
NS              718
DS              2
SWH            10330.578 Hz
FIDRES         0.157632 Hz
AQ              3.1720407 se
RG              14.3
DW              48.400 us
DE              6.00 us
TE              298.0 K
D1              1.00000000 se
D10             1
    
```

```

===== CHANNEL f1 =====
NUC1            1H
P1              10.00 us
PL1             -4.00 dB
PL1W            6.30957365 W
SFO1            500.1330885 MH
SI              32768
SF              500.1300108 MH
WDW             EM
SSB             0
LB              0.30 Hz
GB              0
PC              0.50
    
```

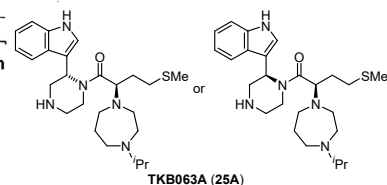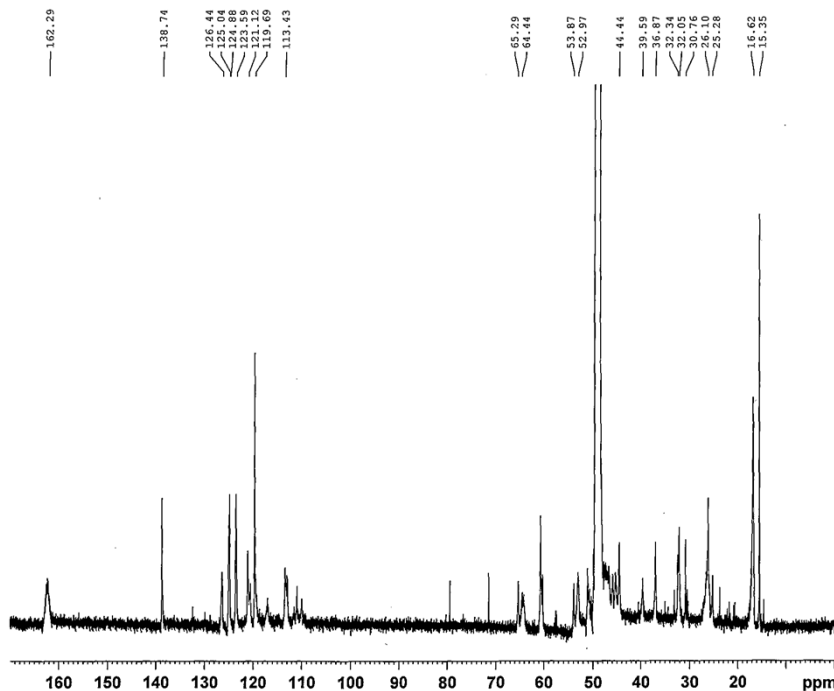

#### IBB-nmr Analysis

```

NAME           MKU-1614
EXPNO          7
PROCNO         1
Date_          20191128
Time           9.59
INSTRUM        av500
PROBHD         5 mm CPDCH 13C
PULPROG        zgpg30
TD              65536
SOLVENT        MeOD
NS              12407
DS              4
SWH            30030.029 Hz
FIDRES         0.458222 Hz
AQ              1.0912410 sec
RG              256
DW              16.650 usec
DE              20.00 usec
TE              298.0 K
D1              2.00000000 sec
D11             0.03000000 sec
D10             1
    
```

```

===== CHANNEL f1 =====
NUC1            13C
P1              10.00 usec
PL1             -5.00 dB
PL1W            14.29790783 W
SFO1            125.7703643 MHz
    
```

```

===== CHANNEL f2 =====
CPDPRG2        waltz16
NUC2            1H
PCPD2          80.00 usec
PL2            -4.00 dB
PL12           14.06 dB
PL13           17.00 dB
PL2W           6.30957365 W
PL12W          0.09862794 W
PL13W          0.05011872 W
SFO2           500.1320005 MHz
SI              32768
SF             125.7576125 MHz
WDW            EM
SSB            0
LB              1.00 Hz
GB              0
PC              0.30
    
```

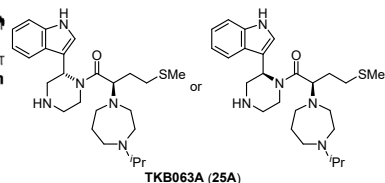



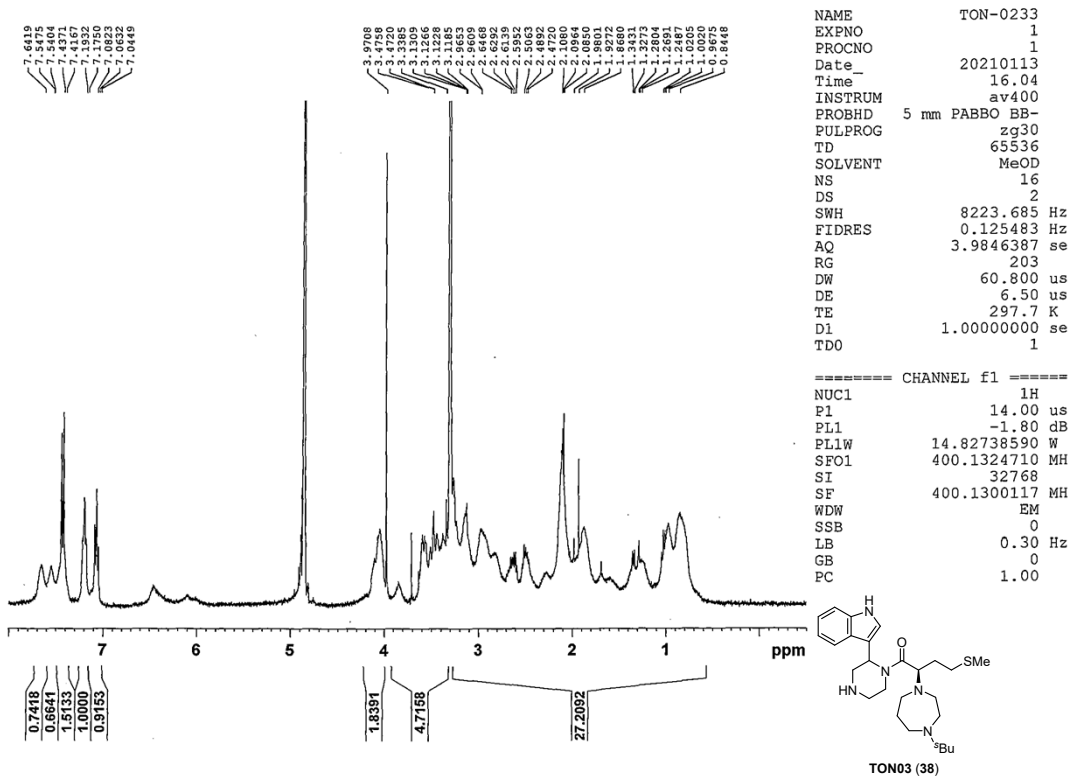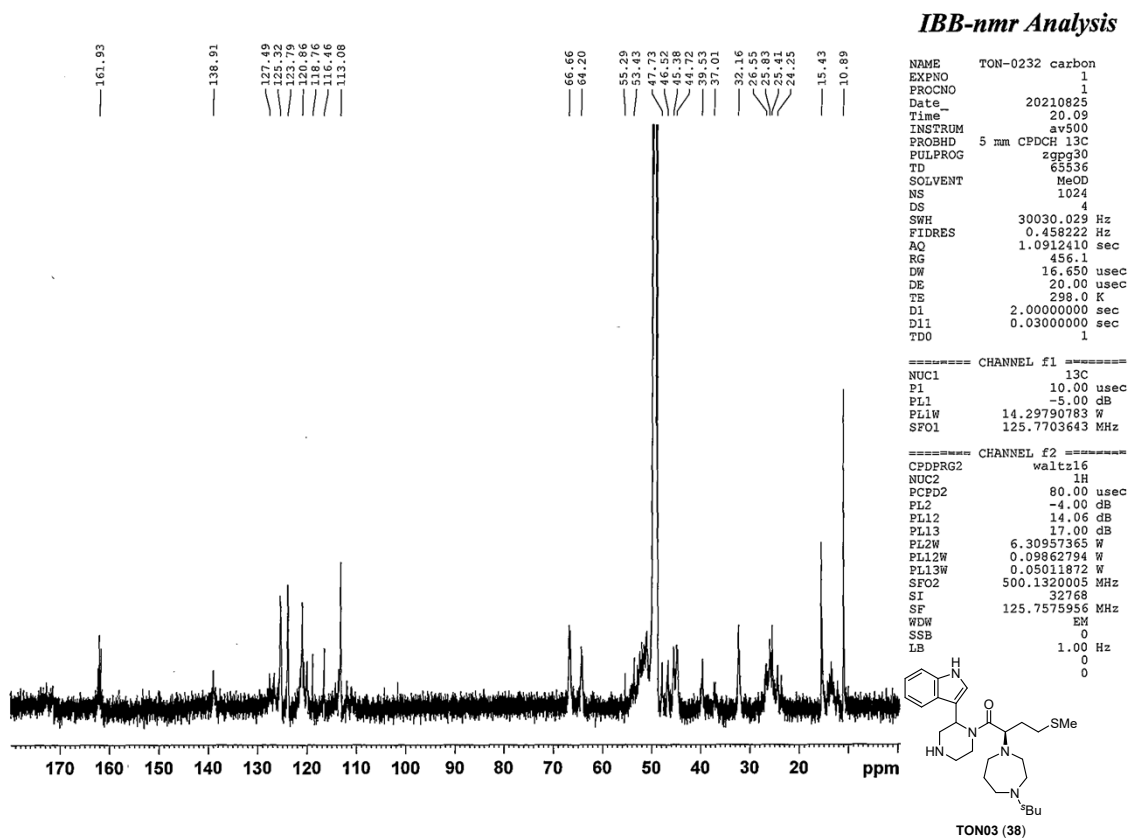

## V. High Resolution Mass Spectrometry (HRMS) charts (compounds 25A, 25B and 38)

### Mass Spectrum SmartFormula Report

**Analysis Info**  
 Analysis Name D:\Data\B\mkurakami\20200114\20200114000004.d Acquisition Date 1/14/2020 2:31:27 PM  
 Method esi\_pos\_low.m Operator BDAL@DE  
 Sample Name MKU-1614 Instrument micrOTOF 000000.00000  
 Comment (+)-TKB063 HRMS

**Acquisition Parameter**

|             |            |                      |          |                  |           |
|-------------|------------|----------------------|----------|------------------|-----------|
| Source Type | ESI        | Ion Polarity         | Positive | Set Nebulizer    | 0.4 Bar   |
| Focus       | Not active |                      |          | Set Dry Heater   | 200 °C    |
| Scan Begin  | 50 m/z     | Set Capillary        | 4500 V   | Set Dry Gas      | 4.0 l/min |
| Scan End    | 3000 m/z   | Set End Plate Offset | -500 V   | Set Divert Valve | Source    |

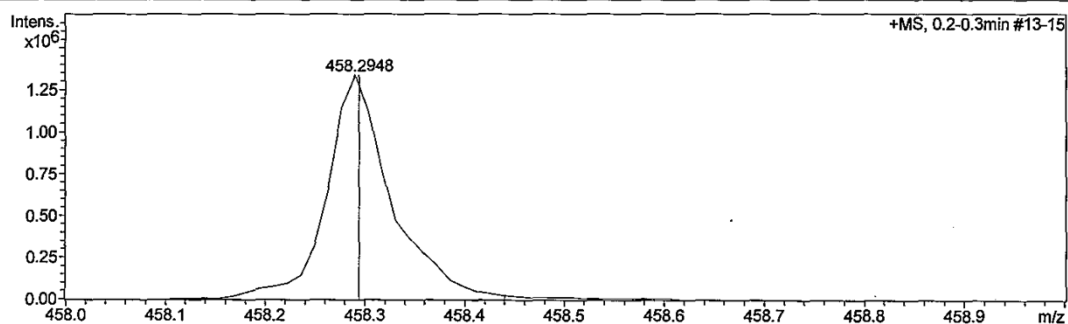

| Meas. m/z | # | Ion Formula                                                   | m/z      | err [ppm] | mSigma | # mSigma | Score  | rdB | e <sup>-</sup> Conf | N-Rule |
|-----------|---|---------------------------------------------------------------|----------|-----------|--------|----------|--------|-----|---------------------|--------|
| 458.2948  | 1 | C <sub>25</sub> H <sub>40</sub> N <sub>5</sub> O <sub>5</sub> | 458.2948 | 0.0       | 2.7    | 1        | 100.00 | 8.5 | even                | ok     |

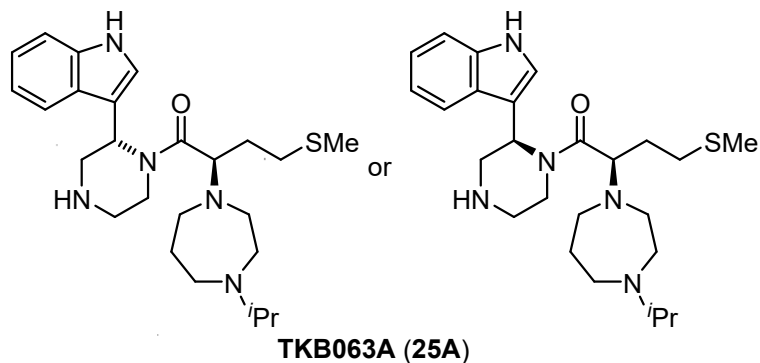



## Mass Spectrum SmartFormula Report

**Analysis Info**

Analysis Name D:\Data\B\mkurakami\20200114\20200114000005.d  
 Method esi\_pos\_low.m  
 Sample Name MKU-1614  
 Comment (-)-TKB063 HRMS

Acquisition Date 1/14/2020 2:38:56 PM

Operator BDAL@DE  
 Instrument micrOTOF 000000.00000

**Acquisition Parameter**

|             |            |                      |          |                  |           |
|-------------|------------|----------------------|----------|------------------|-----------|
| Source Type | ESI        | Ion Polarity         | Positive | Set Nebulizer    | 0.4 Bar   |
| Focus       | Not active |                      |          | Set Dry Heater   | 200 °C    |
| Scan Begin  | 50 m/z     | Set Capillary        | 4500 V   | Set Dry Gas      | 4.0 l/min |
| Scan End    | 3000 m/z   | Set End Plate Offset | -500 V   | Set Divert Valve | Source    |

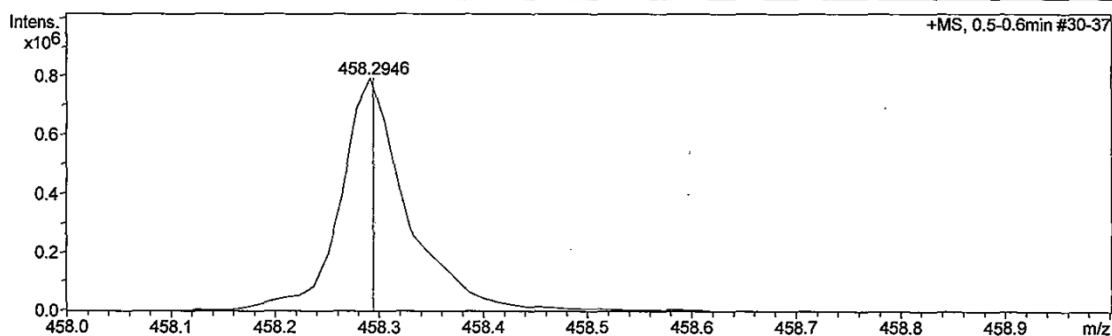

| Meas. m/z | # | Ion Formula                                                     | m/z      | err [ppm] | mSigma | # mSigma | Score  | rdb | e <sup>-</sup> Conf | N-Rule |
|-----------|---|-----------------------------------------------------------------|----------|-----------|--------|----------|--------|-----|---------------------|--------|
| 458.2946  | 1 | C <sub>25</sub> H <sub>40</sub> N <sub>5</sub> O <sub>3</sub> S | 458.2948 | 0.3       | 4.5    | 1        | 100.00 | 8.5 | even                | ok     |

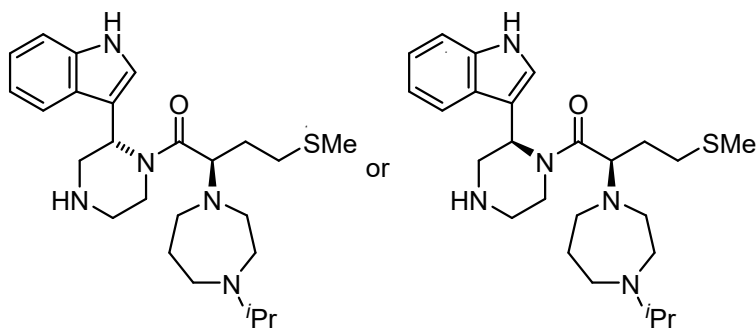

## Mass Spectrum SmartFormula Report

### Analysis Info

Analysis Name D:\Data\B\tonishi\20210115000001.d  
Method esi\_pos\_wide.m  
Sample Name TON-0233  
Comment

Acquisition Date 1/15/2021 12:48:49 PM

Operator BDAL@DE  
Instrument micrOTOF 000000.00000

### Acquisition Parameter

|             |            |                      |          |                  |           |
|-------------|------------|----------------------|----------|------------------|-----------|
| Source Type | ESI        | Ion Polarity         | Positive | Set Nebulizer    | 0.4 Bar   |
| Focus       | Not active |                      |          | Set Dry Heater   | 200 °C    |
| Scan Begin  | 50 m/z     | Set Capillary        | 4500 V   | Set Dry Gas      | 4.0 l/min |
| Scan End    | 3000 m/z   | Set End Plate Offset | -500 V   | Set Divert Valve | Source    |

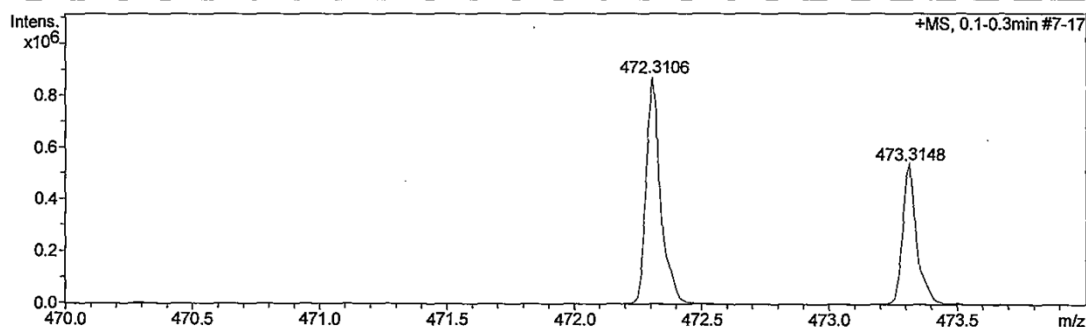

| Meas. m/z | # | Ion Formula | m/z      | err [ppm] | mSigma | # mSigma | Score  | rdb | e <sup>-</sup> Conf | N-Rule |
|-----------|---|-------------|----------|-----------|--------|----------|--------|-----|---------------------|--------|
| 472.3106  | 1 | C26H42N5OS  | 472.3105 | -0.4      | 158.3  | 1        | 100.00 | 8.5 | even                | ok     |

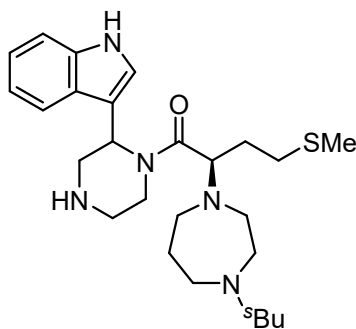

TON03 (38)

## VI. HPLC charts (compounds 2, 17, 18, 19, 25A, 25B, 26, 27, 29, 36, 37 and 38)

All of the tested compounds (2, 17, 18, 19, TKB63A (25A), TKB63B (25B), 26, 27, 29, TON01 (36), TON02 (37) and TON03 (38)) were >99% purity by HPLC analysis (Figures S1-12).

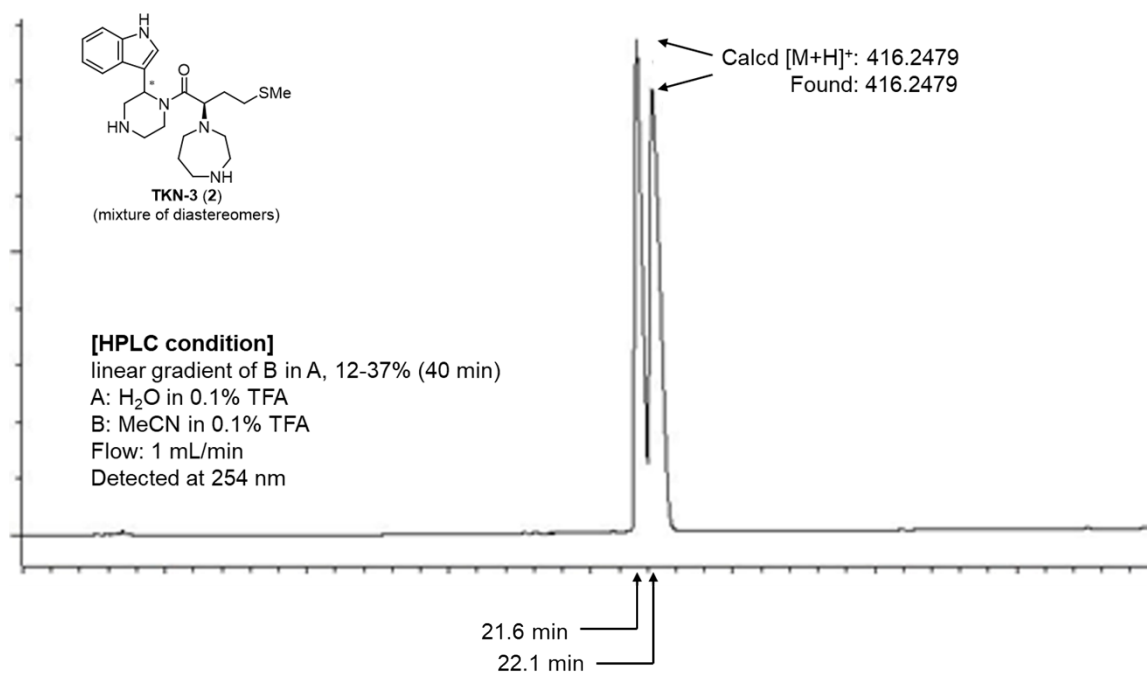

Figure S1. HPLC chart of MKN-3 (2).

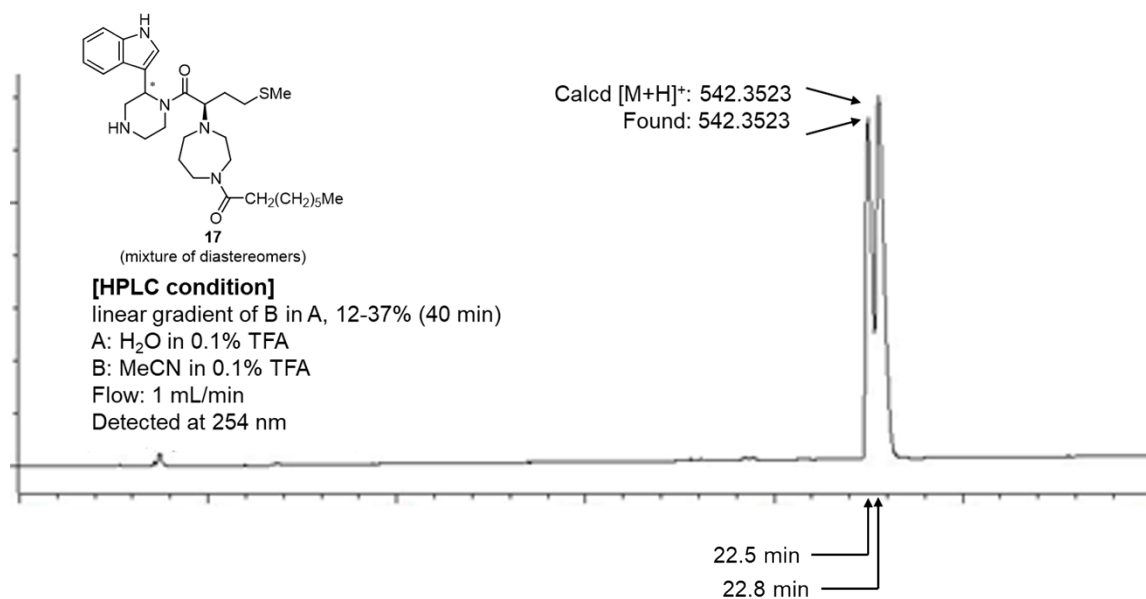

Figure S2. HPLC chart of compound 17.

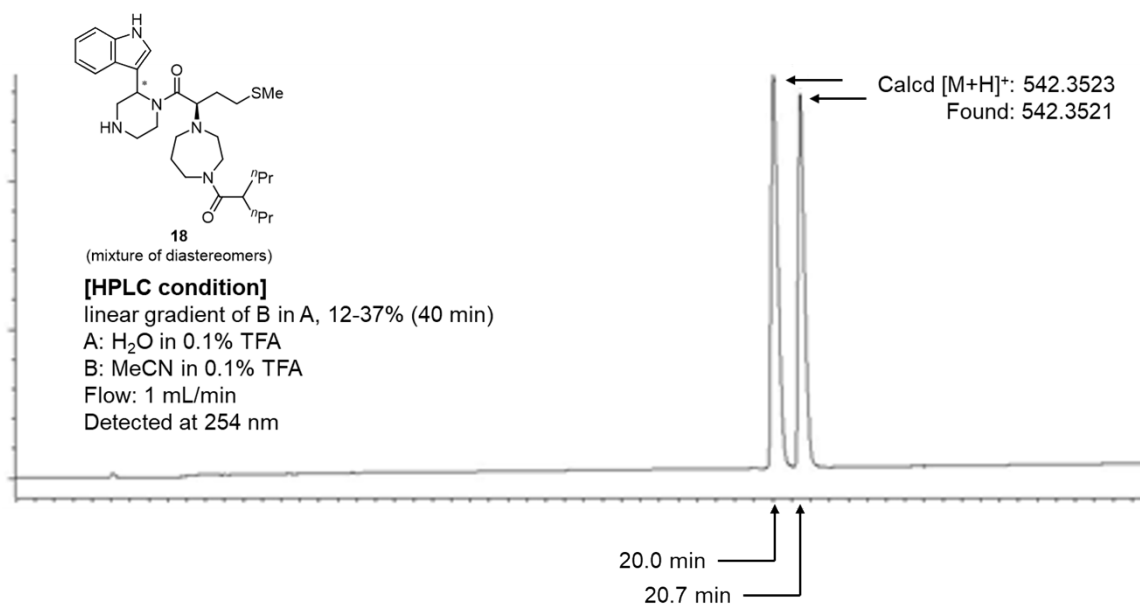

Figure S3. HPLC chart of compound **18**.

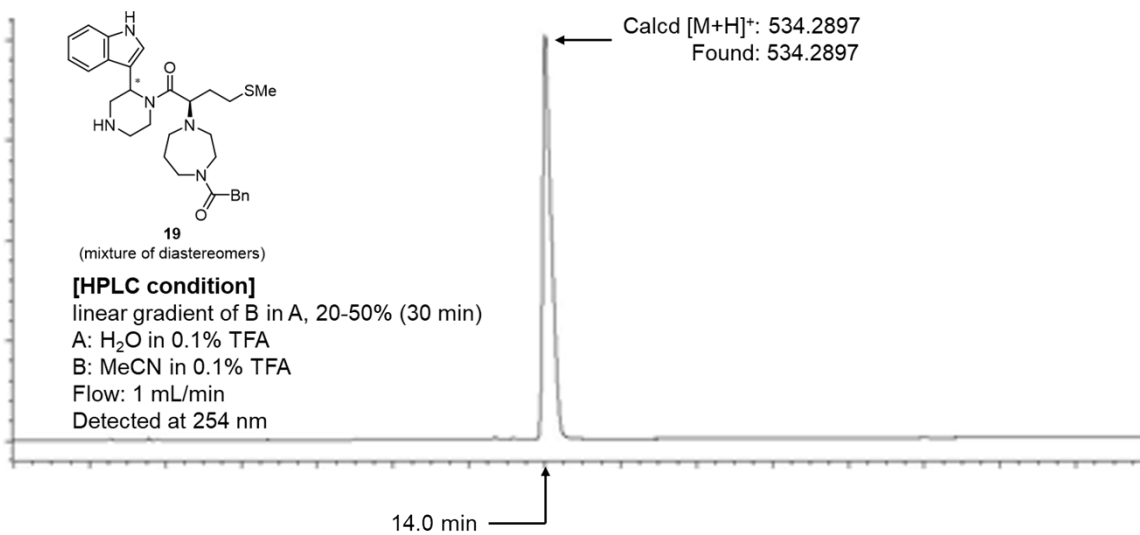

Figure S4. HPLC chart of compound **19**.

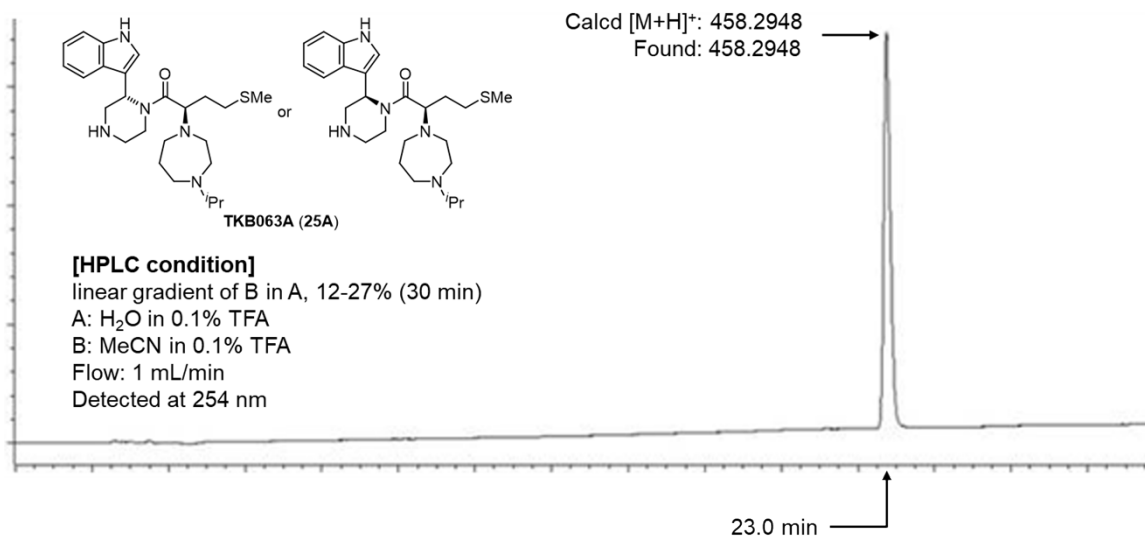

Figure S5. HPLC chart of TKB063A (**25A**).

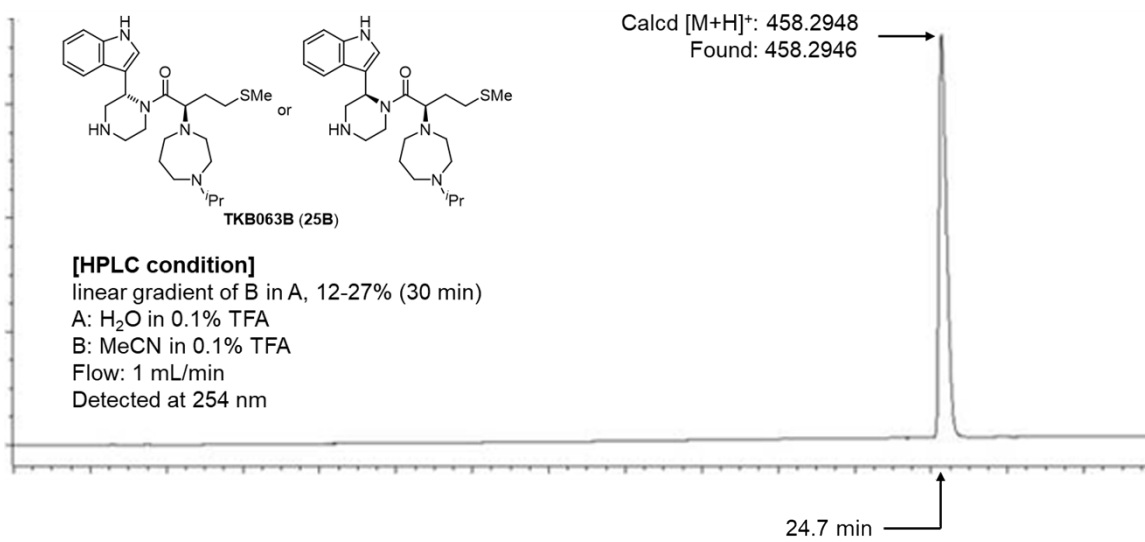

Figure S6. HPLC chart of TKB063B (**25B**).

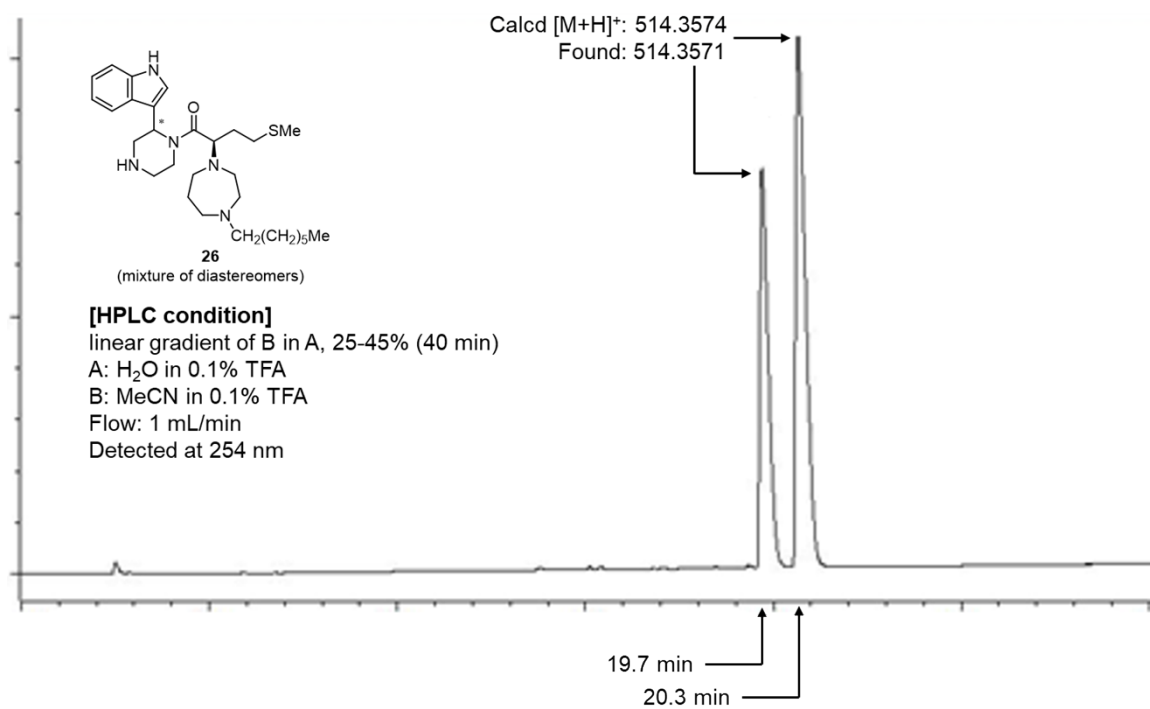

Figure S7. HPLC chart of compound 26.

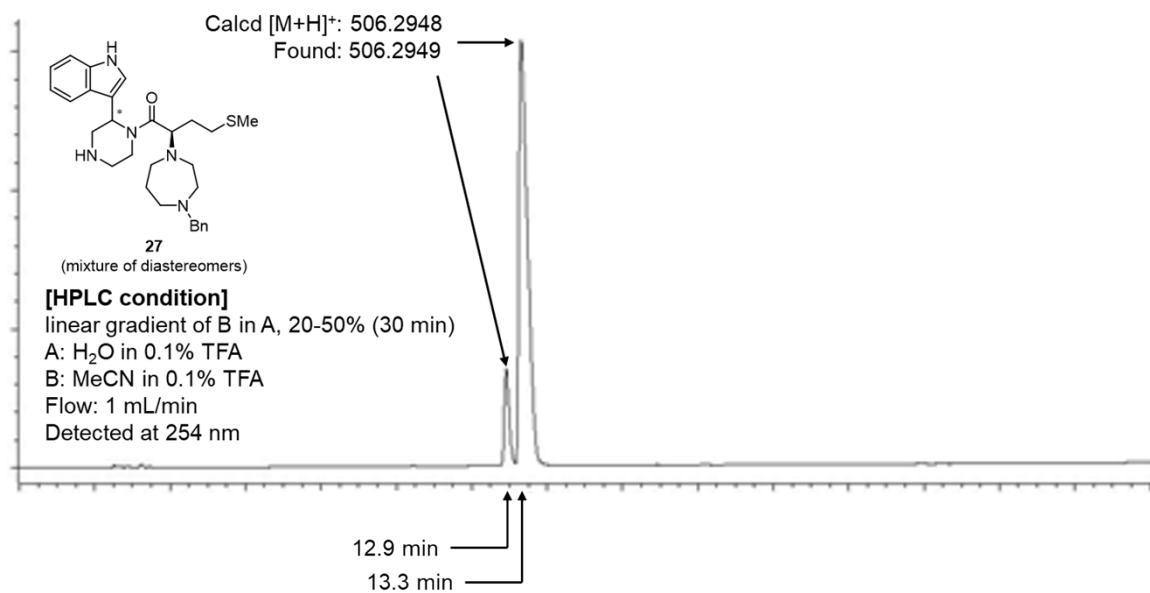

Figure S8. HPLC chart of compound 27.

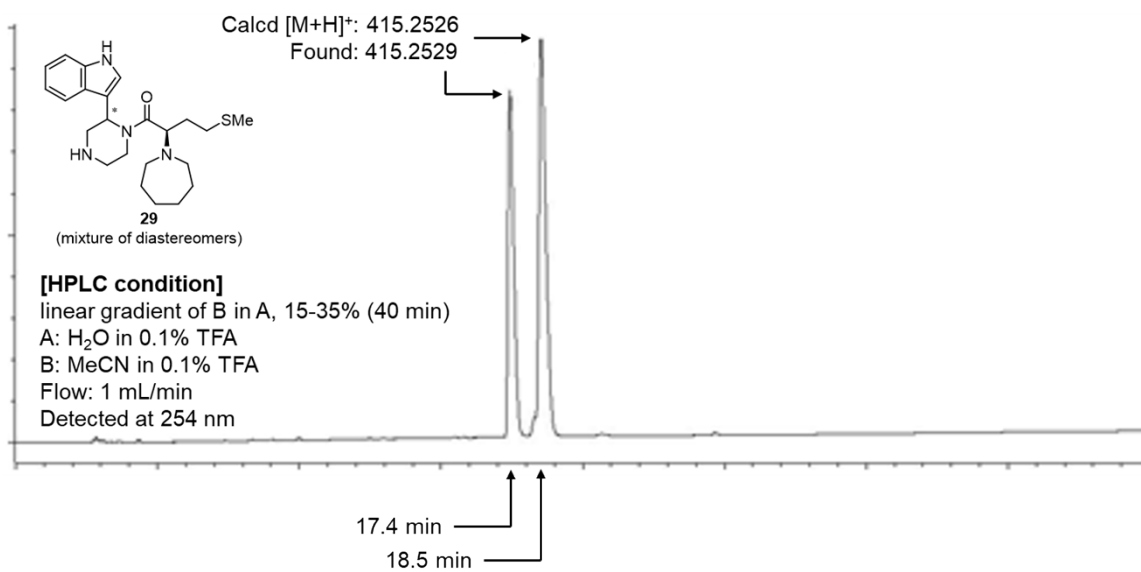

Figure S9. HPLC chart of compound **29**.

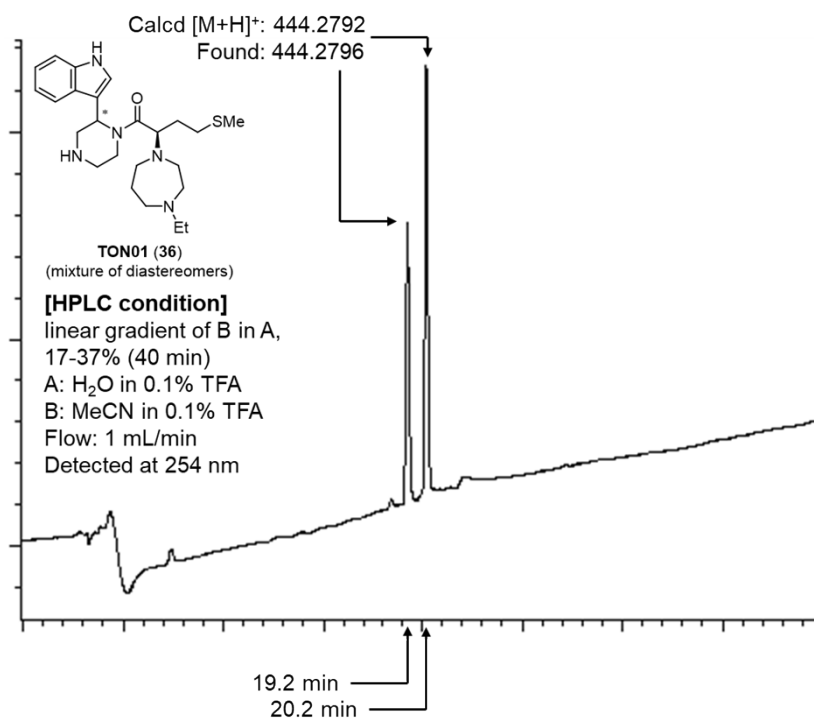

Figure S10. HPLC chart of TON01 (**36**).

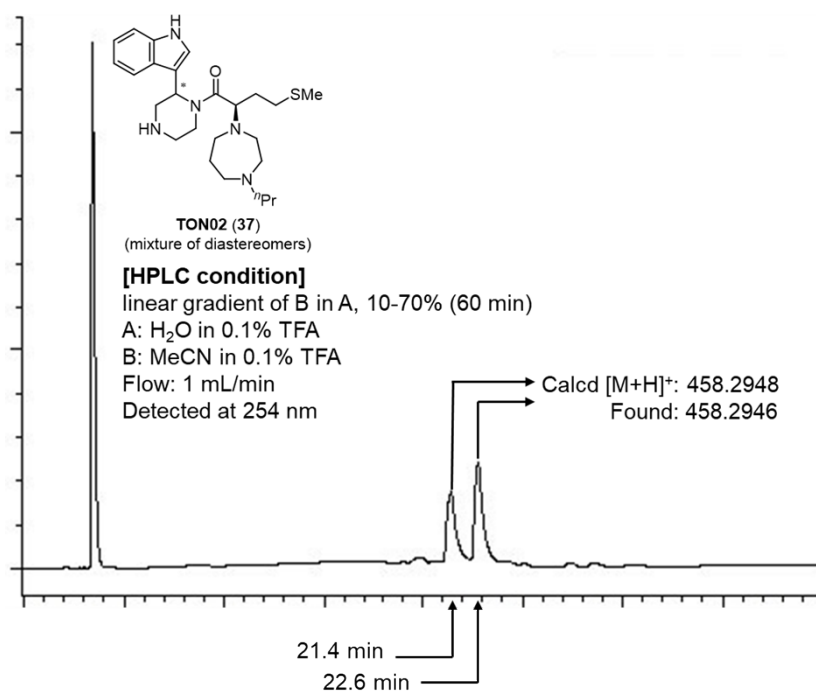

Figure S11. HPLC chart of TON02 (**37**).

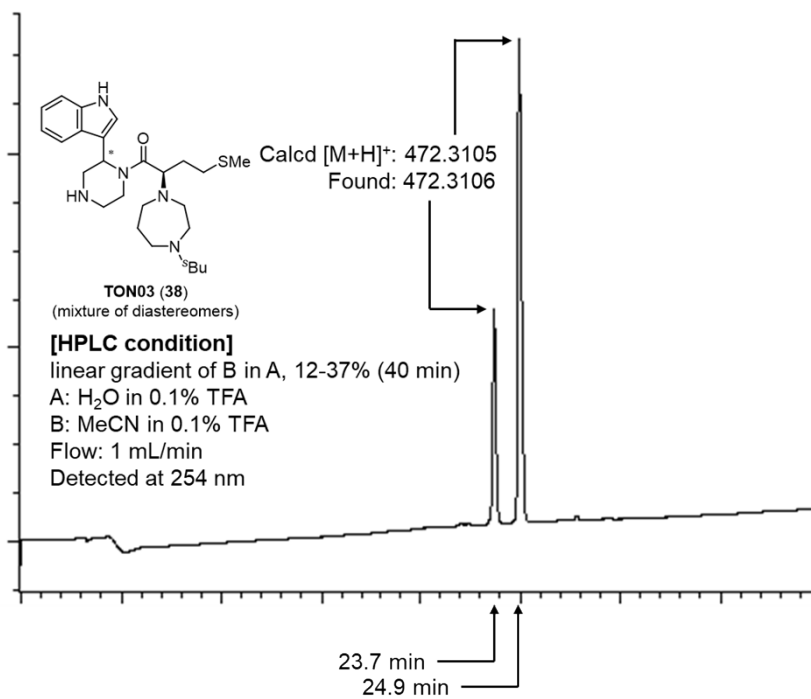

Figure S12. HPLC chart of TON03 (**38**).
